1  
2  
3  
4  
5  
6  
7  
8  
9  
10  
11  
12  
13  
14  
15  
16  
17  
18  
19

Butterfly abundance declines over 20 years of systematic monitoring in Ohio, USA

Tyson Wepprich<sup>1\*</sup>, Jeffrey R. Adrion<sup>2</sup>, Leslie Ries<sup>3</sup>, Jerome Wiedmann<sup>4</sup>, Nick M. Haddad<sup>5</sup>

1. Department of Botany and Plant Pathology, Oregon State University, Corvallis, Oregon, United States of America
2. Institute of Ecology and Evolution, University of Oregon, Eugene, Oregon, United States of America
3. Department of Biology, Georgetown University, Washington, D.C., United States of America
4. The Ohio Lepidopterists, Columbus, Ohio, United States of America
5. Department of Integrative Biology and W.K. Kellogg Biological Station, Michigan State University, Hickory Corners, Michigan, United States of America

\* Corresponding author

Email: [tyson.wepprich@oregonstate.edu](mailto:tyson.wepprich@oregonstate.edu) (TW)

## 20 **Abstract**

21           Severe insect declines make headlines, but they are rarely based on systematic  
22 monitoring outside of Europe. We estimate the rate of change in total butterfly abundance and  
23 the population trends for 81 species using 21 years of systematic monitoring in Ohio, USA. Total  
24 abundance is declining at 2% per year, resulting in a cumulative 33% reduction in butterfly  
25 abundance. Three times as many species have negative population trends compared to positive  
26 trends. The rate of total decline and the proportion of species in decline mirror those documented  
27 in three comparable long-term European monitoring programs. Multiple environmental changes  
28 such as climate change, habitat degradation, and agricultural practices may contribute to these  
29 declines in Ohio and shift the makeup of the butterfly community by benefiting some species  
30 over others. Our analysis of life-history traits associated with population trends shows an impact  
31 of climate change, as species with northern distributions and fewer annual generations declined  
32 more rapidly. However, even common and invasive species associated with human-dominated  
33 landscapes are declining, suggesting widespread environmental causes for these trends. Declines  
34 in common species, although they may not be close to extinction, will have an outsized impact  
35 on the ecosystem services provided by insects. These results from the most extensive, systematic  
36 insect monitoring program in North America demonstrate an ongoing defaunation in butterflies  
37 that on an annual scale might be imperceptible, but cumulatively has reduced butterfly numbers  
38 by a third over 20 years.

39

## 40 **Introduction**

41           Defaunation, or the drastic loss of animal species and declines in abundance, threatens to  
42 destabilize ecosystem functioning globally (1). In comparison to studies of vertebrate

43 populations, monitoring of changes in insect diversity is more difficult and far less prevalent  
44 (2,3). Despite this, a global analysis of long-term population trends across 452 species estimated  
45 that insect abundance had declined 45% over 40 years (1). Recently, more extreme declines in  
46 insect biomass have been observed upon resampling after 2-4 decades (4,5). Losses of total  
47 biomass or total abundance across all species may be more consequential than local declines in  
48 species diversity, as common insect species contribute the most to ecosystem services, such as  
49 pollination (6). However, our knowledge of insect declines is skewed towards European  
50 monitoring programs, including in global analyses (1). In this study, we analyze long-term,  
51 region-wide trends in abundance across a diversity of species for an entire insect group in North  
52 America to examine the scope of insect defaunation.

53         The best source of data to assess insect defaunation comes from large-scale, systematic  
54 monitoring programs of multiple species (3). Through these efforts, trained volunteers or citizen  
55 scientists have contributed much of the evidence for biotic responses to anthropogenic climate  
56 warming such as changes in insect phenology and range distributions (7,8). Unlike citizen  
57 science reporting of opportunistic observations or species checklists, many insect monitoring  
58 programs use a systematic protocol developed specifically to track butterfly abundances through  
59 time, both within and between seasons, and over large spatial scales (9). Pollard-based  
60 monitoring programs, modeled after the first nationwide Butterfly Monitoring Scheme launched  
61 in the United Kingdom in 1977 (UKBMS), use weekly standardized counts on fixed transects  
62 (10). Their widespread adoption enables regional comparisons of insect responses to  
63 environmental change or defaunation (11,12). We compare our analysis with exemplary long-  
64 term monitoring schemes from Europe to test if the rate of insect declines generalizes across  
65 continents.

66           The best source of abundance data for assessment of chronic insect decline, and the most  
67 prominent source of data in (1), is within the butterflies. Due to the relative ease and popularity  
68 of monitoring butterflies, environmental assessments use them as an indicator taxa for the  
69 general trajectory of biodiversity, assuming that they experience comparable pressures from  
70 land-use change, climate change, and habitat degradation as other insect taxa (13–15). Intensive  
71 long-term monitoring of individual butterfly species has provided rigorous, quantitative  
72 estimates of declines. Most prominently, the Eastern North American Monarch has declined by  
73 over 85% (16) and the Western North American Monarch by over 95% (17) over the past two  
74 decades. Severe declines have also been observed in some of the rarest butterflies (18,19). These  
75 data from individual species of conservation concern may not represent a broader trend across  
76 butterflies, which is what we aim to document in this study.

77           Volunteers, organized and trained by The Ohio Lepidopterists, have assembled the most  
78 extensive dataset of systematic butterfly counts that stands alone in North America in terms of  
79 the spatial extent and sampling frequency of Pollard walks (9). Three other monitoring programs  
80 in the United States have documented long-term, multi-species population trends. In  
81 Massachusetts, based on species lists from field trips, climate-driven community shifts explain  
82 how the relative likelihood of species observations change over 18 years (20). Shapiro and  
83 colleagues have made biweekly presence/absence observations and Pollard-based counts on 11  
84 fixed transects along an elevational gradient in California over more than 45 years to document  
85 species richness changes in response to climate and land-use, increasing abundance at a high  
86 elevation site, and impacts of agricultural practices on abundance at low elevation sites (21,22).  
87 Several teams have monitored declines in specialist butterflies restricted to native prairie patches  
88 in the Midwestern states with transect or timed survey methods over 26 years (23,24). The

89 growing number of Pollard-based monitoring programs in the United States (9) has the potential  
90 to track how widespread and consistent butterfly trends are across regions.

91 Here, we used 21 years of weekly butterfly surveys across 104 sites to assess abundance  
92 trends for butterflies in Ohio. We estimate population trends for 81 species and test for their  
93 association with life-history traits and phylogenetic relatedness. We review findings from  
94 European butterfly monitoring schemes for quantitative comparison with the rate of abundance  
95 changes in Ohio. This analysis provides evidence of widespread insect defaunation and species'  
96 declines from the most extensive, systematic monitoring program in North America.

97

## 98 **Materials and methods**

### 99 *Study sites*

100 We studied butterfly population trends across the state of Ohio in the Midwestern USA.  
101 Over its 116,100 km<sup>2</sup> land area, Ohio has a mosaic of habitat types due to its partially glaciated  
102 history and its place at the confluence of Midwestern prairies, the Appalachian Mountains, and  
103 the boreal forest (25). Only remnants of wetland and prairie habitat remain in the state due to  
104 human modification of the landscape. Some rare butterflies have declined due to forest  
105 succession following suppression of disturbances (26). Agriculture and pastures (50%), forest  
106 (30%), and urban development (10%) are the predominant land-use/land cover classes (27).

107 Monitoring sites have a Northeast to Southwest gradient in their mean annual  
108 temperatures (mean 18.8°C, range from 14.0°C to 23.6°C) from interpolated daily temperatures  
109 from Daymet over 1996-2016 (Thornton et al. 1997). Mean annual temperatures at these sites  
110 grew at a linear trend of 0.3°C per decade and growing season length has increased by 60 degree-  
111 days (base 5°C) per decade from 1980-2016. Monitoring sites span the state but are concentrated

112 near cities (Fig 1). On average, within a radius of 2 kilometers, monitoring sites have 24%  
113 cropland and pasture, 34% forest, and 30% urban land-use based on the National Land Cover  
114 Dataset (29). Although not considered in this study, impervious surfaces from urban  
115 development influence temperature-dependent butterfly phenology in Ohio through the urban  
116 heat island effect, which may not be fully captured in these gridded temperature interpolations  
117 (30).

118

119 **Fig 1: Transect locations monitored by volunteers with the Ohio Lepidopterists.** Of the 147  
120 sites, this analysis used the 104 sites monitored for three or more years.

121

#### 122 *Monitoring surveys*

123 Trained volunteers contributed 24,405 butterfly surveys from 1996 to 2016 as part of the  
124 Ohio Lepidopterists Long-term Monitoring of Butterflies program. Volunteers surveyed on fixed  
125 paths at approximately weekly intervals during the entire growing season from April through  
126 October (median 23 of 30 weeks surveyed per year per site) and count every species within an  
127 approximate 5-meter buffer around the observer (10). Surveys are constrained to times of good  
128 weather to increase the detectability of butterflies and last a mean 85 minutes in duration. The  
129 annual number of monitored sites ranged from 13 in 1996 to a maximum of 80 in 2012. We  
130 limited our analysis of abundance trends to the 104 sites with three or more years of monitoring  
131 data and 10 or more surveys per year at each site (Fig 1). We included observations of all sites  
132 with at least 5 surveys per year in phenology models that we used to interpolate missing counts  
133 before estimating abundance (31).

134 All 102 species with population indices estimated by phenology models contributed to  
135 the total abundance analysis. We limited species-specific analysis to 81 species with sufficient  
136 population indices for estimating trends (present at five or more sites and for 10 or more years).  
137 Species naming conventions in the monitoring program follow those used in Opler and Krizek  
138 (1984) and Iftner et al. (1992) except for combining all observations of *Celastrina ladon* (Spring  
139 Azure) and *Celastrina neglecta* (Summer Azure) as an unresolved species complex.

#### 140 *Population indices*

141 We estimated population indices for each site x year x species by adapting methods  
142 established for the UKBMS that account for missing surveys and butterfly phenology over the  
143 season (31,33). We used generalized additive models for each species to estimate variation in  
144 counts in order to interpolate missing surveys with model predictions (31,34). To account for  
145 seasonal, spatial, and interannual variation in species phenology, we extended the regional  
146 generalized additive model approach (12, Supplement 1) by including spatially-explicit site  
147 locations and converting calendar dates of observations to degree-days (35), which can improve  
148 butterfly phenology predictions (36). We calculated the population index by integrating over the  
149 weekly counts and missing survey interpolations using the trapezoid method (31).

#### 150 *Controlling for confounding factors*

151 We accounted for differences in sampling across sites and years so that our modeled  
152 trends would capture changes in abundance rather than changes in detection probability (37).  
153 True abundance is confounded with detection probability when using counts from Pollard walks  
154 (38). Butterfly monitoring protocols that account for detection probability like distance sampling  
155 are commonly used for single-species studies (39), but untenable for scaling up to a regional  
156 program. Most analyses of Pollard walks assume no systematic change in detectability (but see

157 (40)) because counts correlate closely with true abundance estimates from distance sampling  
158 (41,42). We used two covariates to account for variation in sampling and its influence on  
159 population indices for each site x year (20,37,43). We tracked the mean number of species  
160 reported in each survey, or list-length, which is a synthetic measure of factors influencing  
161 detectability such as weather conditions, site quality, and observer effort (20,44,45). We treated  
162 the total duration of surveys in minutes as an offset in the models of population trends. Because  
163 we interpolated missing surveys for the population indices, we projected what the total duration  
164 would be if all 30 weeks had been surveyed at the mean duration reported for that site x year.

165         Sampling across the state is nonrandom because participants choose transect locations, a  
166 common practice in volunteer-based monitoring programs. Since sites generally cluster near  
167 human population centers with a greater proportion of developed land-use and a lesser  
168 proportion of agriculture, we assumed that population trends at the 104 sites across the state  
169 sufficiently capture the broader statewide trends (37). Comparisons between the UKBMS  
170 volunteer-placed transects and a broader survey with stratified, random sampling show  
171 congruence between species trends estimated from each monitoring strategy (46).

## 172 *Population Trends*

173         We used generalized linear mixed models to estimate temporal trends in relative  
174 abundance for 81 species from their population indices (47). We modeled population indices at  
175 each site and year as an over-dispersed Poisson random variable with covariates on the log-link  
176 scale.

$$\log(\text{PopulationIndex}) = \beta_0 + \beta_1 \times \text{year} + \beta_2 \times \text{listlength} + \log(\text{duration}) + \text{siteID} \\ + \text{yearID} + \text{siteyearID}$$



177 We included the numeric year and mean list length for each population index as  
178 covariates, which were centered to aid in model fitting and interpretation (48). We used the  
179 coefficient for year ( $\beta_2$ ) as the annual trend in population indices as our main result. We  
180 controlled for changes in sampling by using the total duration of surveys as a model offset,  
181 converting the dependent variable to a rate of butterflies counted per minute. Random effects of  
182 individual sites and years account for spatial and temporal variation in population counts  
183 deviating from the statewide trend. We accounted for over-dispersion in the Poisson-distributed  
184 counts with the random effect *siteyearID* for each unique observation (49). We modeled trends  
185 in total abundance using the same modeling approach, but summed across 102 species'  
186 population indices for each site x year observation. We interpreted trends as an annual rate by  
187 taking the geometric mean rate of change between the predicted abundance between two points  
188 in time after setting the list-length covariate to its mean and excluding the random effects (47).  
189 For comparisons with other monitoring programs, we used a *p*-value threshold of 0.05 to classify  
190 trends as positive, negative, or stable.

191 Our approach is similar to that used by the UKBMS and other European monitoring  
192 programs which use generalized linear models in TRIM software (50). One key difference is that  
193 our site and annual fluctuations from the temporal trend were derived from random effects rather  
194 than fixed effects, which reduces spurious detection of trends (43). Another key difference is that  
195 TRIM does not allow for continuous covariates, which we used to account for sampling variation  
196 instead of assuming no confounding pattern in sampling effort. To validate that our modeling  
197 choices did not unreasonably influence the results, we used three alternative approaches: (1) a  
198 Poisson-based generalized linear model (equation 1 without the random effect *siteyearID*); (2) a  
199 nonlinear generalized additive mixed model with a smoothing spline replacing the linear

200 temporal trend (43); and (3) a TRIM model with over-dispersion and serial temporal correlation  
201 but no sampling covariates or offsets (50). We compared similarity in the total abundance trends,  
202 the correlation of species' trends between model alternatives, and the classification of species'  
203 trends as positive, stable, or negative.

#### 204 *Comparison with other studies*

205 We compare our findings to three European long-term, regional butterfly monitoring  
206 programs with systematic Pollard walks that publish regular updates on total abundance and  
207 species' trends (40,51,52). Although all programs analyzed counts with Poisson regression, we  
208 had to standardize them differently depending on the data available and their modeling  
209 approaches. The UKBMS reports total abundance indicators as the geometric mean of species  
210 trends from two groups: specialist and countryside species (51). We used the reported smoothed  
211 annual index values for these indicators because the first year of monitoring is an outlier that  
212 exaggerates declines (UK Biodiversity Indicators 2018, <http://jncc.defra.gov.uk/page-4236>). We  
213 used the Dutch Butterfly Monitoring Scheme's reported cumulative annual trend in total  
214 butterflies counted across all transects after correction for missing surveys (52). For the Catalan  
215 Butterfly Monitoring Scheme, we extracted annual population indices from the 2015-2016  
216 annual report (53) with WebPlotDigitizer 4.1 (54) and performed a Poisson regression over time  
217 with annual random effects to obtain a comparable abundance trend. We converted total  
218 abundance trends into annual percent rates for comparison. We tallied the increases and  
219 decreases in species' trends for each region reported by the monitoring program, without  
220 accounting for differences in their statistical approaches.

#### 221 *Species' traits*

222 To explore potential mechanisms that might explain species-level variation in abundance  
223 trends, we modeled the estimates of species' temporal trends ( $\beta_1$ ) as a response to life history  
224 traits (20,30). Of the 81 species, we classified 14 as migratory species and 67 as year-round  
225 residents of Ohio. We analyzed traits models both across all species and after excluding  
226 migratory species, which would have population trends driven by factors outside of Ohio. We  
227 collected traits that relate to insect responses to climate change and habitat change, as these are  
228 two primary drivers of butterfly community changes (7,20,21).

229 We tested if butterflies with traits making them more adaptive to a warming climate have  
230 more positive population trends. We compared species with different range distributions,  
231 assuming that species distributed in warmer, Southern regions would be more likely to increase  
232 in Ohio as the climate warms. We assigned species' ranges as Southern, core, or Northern by  
233 range maps and county records (25,32). Voltinism, or the number of generations per year,  
234 increases in warmer years and warmer regions within many species in Ohio (55), compared with  
235 obligate univoltine species that do not adjust their lifecycle based on changing growing season  
236 length. We assigned voltinism observed in Ohio as univoltine, bivoltine, or multivoltine (3+  
237 generations per year) based on visualization of phenology models and (25). The life stage in  
238 which species overwinter, obtained from (25), contributes to its ability to respond to warming  
239 with shifts in phenology (20,56).

240 We would expect more generalist species, in host plant requirements and habitat  
241 preferences, to have more positive population trends in a landscape heavily modified by human  
242 use (21,51). For host plant requirements, we gathered two traits from the literature that describe  
243 host plant category (forb, graminoid, or woody) and whether the butterfly's host plant  
244 requirements span multiple plant families or are limited to one plant family or genus (25). Mean

245 wing size from (32) was used as a surrogate of dispersal ability between habitats, which is  
246 expected to increase ability to access resources in a fragmented landscape. Three of the authors  
247 assigned species as wetland-dependent or human-disturbance tolerant species, which we  
248 aggregated into two binary variables to test if these specialist or generalist habitat preferences  
249 correlate with abundance trends.

250 We used univariate linear models for each life history trait both for all 81 species and  
251 with the 14 migratory species excluded. To account for the phylogenetic relatedness and the non-  
252 independence across species, we also used phylogenetic generalized least squares models that  
253 estimated branch length transformations with Pagel's lambda by maximum likelihood (57). The  
254 phylogenetic models excluded three species without gene sequences available.

#### 255 *Phylogenetic tree*

256 We obtained coding sequences for the most widely used DNA barcoding locus, the  
257 mitochondrial cytochrome c oxidase subunit I gene COI-5P, from GenBank (58). For species not  
258 found in GenBank, we obtained coding sequences from The Barcode of Life Data System (59).  
259 When possible, we obtained sequences from multiple sampling locations in North America.

260 Owing to the relatively small size of our multiple-species alignment—i.e. a single  
261 mtDNA locus, 651 base pairs in length—we decided to take both a constrained and  
262 unconstrained maximum likelihood approach to estimate the genealogical relationships of our  
263 samples. Some of the species from our analysis, though not all, were recently used in a more  
264 comprehensive phylogenetic analysis of butterflies (60), thus prompting us to constrain the  
265 phylogenetic backbone of our tree using family-level relationships. We report details of our  
266 workflow in Supplement 1.

#### 267 *Statistical analysis*

268 We used R 3.5.2 for analysis (61) and share the data and our code on Dryad. We fit  
269 generalized additive models with the *mgcv* package (34), generalized linear mixed models with  
270 the *lme4* package (Bates et al. 2015), generalized additive mixed models with the *poptrend*  
271 package (43), and phylogenetic generalized least squares models with the *ape* and *caper*  
272 packages (63,64). Confidence intervals for the temporal trends were estimated with bootstrapped  
273 model fits with the *merTools* and *poptrend* packages (43,65). For models of population trends,  
274 we estimated the goodness of fit with  $R^2$  developed for generalized linear mixed models that give  
275 marginal and conditional  $R^2$  values for the fixed effects and the fixed + random effects,  
276 respectively (66,67). For trait models, we reported the adjusted  $R^2$  values from the univariate  
277 models.

278

## 279 **Results**

280 The statewide relative abundance summed across all species declined at an annual rate of  
281 2.0% ( $\beta_1 = -0.020$ , std. err. 0.005,  $p < 0.001$ ), accumulating a 33% decline over 1996-2016  
282 (Table 1, Fig 2). Among population trends, more than three times as many species are declining  
283 than increasing in abundance at our threshold of  $p < 0.05$  (32 versus 9, respectively) (Table 2,  
284 Fig 3 for migratory species and Fig 4 for resident species). Positive and negative species trends  
285 are distributed across the phylogenetic tree (Fig A in S1 Appendix).

286

287 **Table 1: Generalized linear mixed model of total abundance across all species.** The natural  
288 logarithm of the total survey duration across the monitoring season was an offset in the model.  
289 The model's marginal  $R^2$  was 0.20 for its fixed effects and its conditional  $R^2$  was 0.61 when  
290 including variation in sites, years, and over-dispersion with random effects parameters.

| Fixed effects    | <i>B</i>  | std.error | z statistic | p.value |
|------------------|-----------|-----------|-------------|---------|
| Intercept        | 1.33      | 0.0506    | 26.4        | <0.001  |
| Year (numeric)   | -0.0203   | 0.00496   | -4.11       | <0.001  |
| List-length      | 0.104     | 0.00587   | 17.7        | <0.001  |
| Random effects   | std. dev. | # groups  |             |         |
| Site x year ID   | 0.278     | 1005      |             |         |
| Site ID          | 0.417     | 104       |             |         |
| Year ID (factor) | 0.121     | 21        |             |         |

292 **Table 2: Species' abundance trends over time.** Trends are the coefficient of year in our generalized linear mixed models with the  
 293 accompanying standard error and *p*-value for the coefficient (equation 1). We show the data available for each species' model: total  
 294 number of butterflies recorded for all years, number of sites, number of years, and the number of population indices calculated for  
 295 each species for use in abundance model (Site x year). Bold font indicates trends that were classified as increasing or decreasing (*p* <  
 296 0.05).

| Common                   | Species                      | Sample size        |       |       |               | GLMM temporal trend |               |                  |
|--------------------------|------------------------------|--------------------|-------|-------|---------------|---------------------|---------------|------------------|
|                          | Latin                        | Total #<br>counted | Sites | Years | Site/<br>year | Trend<br>coef.      | Std.<br>error | P                |
| Aphrodite Fritillary     | <i>Speyeria aphrodite</i>    | 477                | 9     | 16    | 131           | <b>-0.233</b>       | <b>0.060</b>  | <b>&lt;0.001</b> |
| Baltimore                | <i>Euphydryas phaeton</i>    | 818                | 7     | 17    | 83            | <b>-0.224</b>       | <b>0.071</b>  | <b>0.002</b>     |
| American Copper          | <i>Lycaena phlaeas</i>       | 10,255             | 31    | 21    | 359           | <b>-0.193</b>       | <b>0.024</b>  | <b>&lt;0.001</b> |
| Hoary Edge Skipper       | <i>Achalarus lyciades</i>    | 291                | 7     | 19    | 88            | <b>-0.178</b>       | <b>0.061</b>  | <b>0.003</b>     |
| Milbert's Tortoise Shell | <i>Nymphalis milberti</i>    | 140                | 8     | 16    | 101           | <b>-0.174</b>       | <b>0.065</b>  | <b>0.008</b>     |
| European Skipper         | <i>Thymelicus lineola</i>    | 46,549             | 57    | 21    | 609           | <b>-0.173</b>       | <b>0.021</b>  | <b>&lt;0.001</b> |
| Southern Cloudywing      | <i>Thorybes bathyllus</i>    | 667                | 15    | 20    | 194           | <b>-0.129</b>       | <b>0.037</b>  | <b>&lt;0.001</b> |
| Falcate Orangetip        | <i>Anthocharis midea</i>     | 756                | 8     | 18    | 103           | <b>-0.123</b>       | <b>0.040</b>  | <b>0.002</b>     |
| Dreamy Duskywing         | <i>Erynnis icelus</i>        | 879                | 18    | 21    | 260           | <b>-0.120</b>       | <b>0.024</b>  | <b>&lt;0.001</b> |
| Swarthy Skipper          | <i>Nastra lherminier</i>     | 448                | 7     | 17    | 78            | <b>-0.114</b>       | <b>0.041</b>  | <b>0.006</b>     |
| Tawny Emperor            | <i>Asterocampa clyton</i>    | 937                | 27    | 19    | 308           | <b>-0.114</b>       | <b>0.036</b>  | <b>0.002</b>     |
| Leonard's Skipper        | <i>Hesperia leonardus</i>    | 1,348              | 11    | 20    | 144           | <b>-0.110</b>       | <b>0.025</b>  | <b>&lt;0.001</b> |
| White M Hairstreak       | <i>Parrhasius m-album</i>    | 95                 | 7     | 15    | 110           | -0.105              | 0.081         | 0.195            |
| Northern Cloudywing      | <i>Thorybes pylades</i>      | 547                | 16    | 20    | 210           | <b>-0.095</b>       | <b>0.033</b>  | <b>0.004</b>     |
| Coral Hairstreak         | <i>Satyrrium titus</i>       | 607                | 15    | 21    | 217           | <b>-0.094</b>       | <b>0.025</b>  | <b>&lt;0.001</b> |
| Juvenal's Duskywing      | <i>Erynnis juvenalis</i>     | 3,838              | 38    | 21    | 487           | <b>-0.083</b>       | <b>0.020</b>  | <b>&lt;0.001</b> |
| Common Wood Nymph        | <i>Cercyonis pegala</i>      | 21,603             | 77    | 21    | 788           | <b>-0.073</b>       | <b>0.013</b>  | <b>&lt;0.001</b> |
| Common Sooty Wing        | <i>Pholisora catullus</i>    | 1,142              | 34    | 20    | 398           | <b>-0.072</b>       | <b>0.015</b>  | <b>&lt;0.001</b> |
| Sleepy Duskywing         | <i>Erynnis brizo</i>         | 811                | 13    | 18    | 156           | <b>-0.071</b>       | <b>0.032</b>  | <b>0.027</b>     |
| Monarch                  | <i>Danaus plexippus</i>      | 46,070             | 104   | 21    | 1,005         | <b>-0.070</b>       | <b>0.023</b>  | <b>0.002</b>     |
| Red-spotted Purple       | <i>Limenitis arthemis</i>    | 6,226              | 87    | 21    | 913           | <b>-0.064</b>       | <b>0.019</b>  | <b>&lt;0.001</b> |
| Bronze Copper            | <i>Lycaena hyllus</i>        | 656                | 23    | 21    | 254           | -0.063              | 0.039         | 0.103            |
| Northern Broken-Dash     | <i>Wallengrenia egeremet</i> | 5,959              | 49    | 21    | 528           | <b>-0.062</b>       | <b>0.018</b>  | <b>&lt;0.001</b> |
| Tawny-edged Skipper      | <i>Polites themistocles</i>  | 2,322              | 48    | 21    | 541           | <b>-0.058</b>       | <b>0.016</b>  | <b>&lt;0.001</b> |
| West Virginia White      | <i>Pieris virginiansis</i>   | 214                | 5     | 16    | 63            | -0.058              | 0.059         | 0.329            |

|                           |                                  |         |     |    |       |               |              |                  |
|---------------------------|----------------------------------|---------|-----|----|-------|---------------|--------------|------------------|
| Fiery Skipper             | <i>Hylephila phyleus</i>         | 3,917   | 57  | 19 | 646   | -0.057        | 0.061        | 0.351            |
| Meadow Fritillary         | <i>Boloria bellona</i>           | 5,447   | 55  | 21 | 598   | <b>-0.056</b> | <b>0.027</b> | <b>0.040</b>     |
| Orange Sulphur            | <i>Colias eurytheme</i>          | 62,160  | 101 | 21 | 996   | <b>-0.055</b> | <b>0.021</b> | <b>0.008</b>     |
| Long Dash                 | <i>Polites mystic</i>            | 1,317   | 21  | 21 | 219   | <b>-0.047</b> | <b>0.020</b> | <b>0.022</b>     |
| American Lady             | <i>Vanessa virginiensis</i>      | 2,029   | 54  | 21 | 637   | -0.045        | 0.033        | 0.179            |
| Black Swallowtail         | <i>Papilio polyxenes</i>         | 12,410  | 92  | 21 | 941   | <b>-0.044</b> | <b>0.015</b> | <b>0.004</b>     |
| Gray Hairstreak           | <i>Strymon melinus</i>           | 2,418   | 49  | 19 | 587   | -0.044        | 0.026        | 0.089            |
| Painted Lady              | <i>Vanessa cardui</i>            | 5,564   | 80  | 21 | 873   | -0.042        | 0.054        | 0.440            |
| Great Spangled Fritillary | <i>Speyeria cybele</i>           | 33,573  | 90  | 21 | 904   | <b>-0.041</b> | <b>0.020</b> | <b>0.047</b>     |
| Hobomok Skipper           | <i>Poanes hobomok</i>            | 6,863   | 51  | 21 | 576   | <b>-0.040</b> | <b>0.014</b> | <b>0.005</b>     |
| Viceroy                   | <i>Limenitis archippus</i>       | 16,079  | 85  | 21 | 896   | <b>-0.039</b> | <b>0.016</b> | <b>0.014</b>     |
| Cabbage White             | <i>Pieris rapae</i>              | 304,105 | 104 | 21 | 1,005 | <b>-0.038</b> | <b>0.010</b> | <b>&lt;0.001</b> |
| Hackberry Emperor         | <i>Asterocampa celtis</i>        | 9,992   | 42  | 20 | 467   | <b>-0.037</b> | <b>0.017</b> | <b>0.033</b>     |
| Striped Hairstreak        | <i>Satyrium liparops</i>         | 155     | 14  | 18 | 211   | -0.028        | 0.067        | 0.682            |
| Variegated Fritillary     | <i>Euptoieta claudia</i>         | 956     | 17  | 19 | 204   | -0.027        | 0.052        | 0.603            |
| Little Wood Satyr         | <i>Megisto cymela</i>            | 76,612  | 87  | 21 | 878   | <b>-0.026</b> | <b>0.009</b> | <b>0.005</b>     |
| American Snout Butterfly  | <i>Libytheana carinenta</i>      | 1,007   | 36  | 18 | 418   | -0.025        | 0.050        | 0.612            |
| Hickory Hairstreak        | <i>Satyrium caryaevorum</i>      | 196     | 12  | 20 | 170   | -0.023        | 0.053        | 0.656            |
| Mourning Cloak            | <i>Nymphalis antiopa</i>         | 3,214   | 85  | 21 | 905   | -0.021        | 0.018        | 0.256            |
| Clouded Sulphur           | <i>Colias philodice</i>          | 49,267  | 102 | 21 | 998   | -0.014        | 0.014        | 0.286            |
| Spicebush Swallowtail     | <i>Papilio troilus</i>           | 25,322  | 82  | 21 | 858   | -0.014        | 0.014        | 0.324            |
| Dun Skipper               | <i>Euphyes vestris</i>           | 1,684   | 49  | 21 | 585   | -0.014        | 0.012        | 0.224            |
| Question Mark             | <i>Polygonia interrogationis</i> | 6,564   | 88  | 21 | 915   | -0.012        | 0.025        | 0.640            |
| Delaware Skipper          | <i>Atrytone logan</i>            | 1,086   | 30  | 21 | 313   | -0.011        | 0.029        | 0.697            |
| Horace's Duskywing        | <i>Erynnis horatius</i>          | 2,885   | 31  | 21 | 376   | -0.011        | 0.023        | 0.633            |
| Eastern Tiger Swallowtail | <i>Papilio glaucus</i>           | 29,299  | 101 | 21 | 996   | -0.010        | 0.015        | 0.483            |
| Pearl Crescent            | <i>Phyciodes tharos</i>          | 180,631 | 104 | 21 | 1,005 | -0.010        | 0.014        | 0.461            |
| Little Yellow             | <i>Eurema lisa</i>               | 1,681   | 24  | 18 | 287   | -0.008        | 0.073        | 0.917            |
| Eastern Comma             | <i>Polygonia comma</i>           | 6,222   | 92  | 21 | 944   | -0.007        | 0.011        | 0.561            |
| Giant Swallowtail         | <i>Papilio cresphontes</i>       | 1,109   | 28  | 21 | 322   | 0.002         | 0.019        | 0.912            |
| Banded Hairstreak         | <i>Satyrium calanus</i>          | 1,107   | 36  | 21 | 468   | 0.004         | 0.031        | 0.896            |
| Silver-spotted Skipper    | <i>Epargyreus clarus</i>         | 54,462  | 102 | 21 | 996   | 0.005         | 0.012        | 0.672            |
| Red Admiral               | <i>Vanessa atalanta</i>          | 28,637  | 97  | 21 | 969   | 0.008         | 0.044        | 0.865            |
| Red-banded Hairstreak     | <i>Calycopis cecrops</i>         | 795     | 7   | 17 | 91    | 0.009         | 0.057        | 0.879            |
| Crossline Skipper         | <i>Polites origenes</i>          | 1,087   | 27  | 21 | 347   | 0.009         | 0.020        | 0.636            |
| Sachem                    | <i>Atalopedes campestris</i>     | 1,445   | 19  | 18 | 231   | 0.013         | 0.058        | 0.823            |
| Peck's Skipper            | <i>Polites peckius</i>           | 23,702  | 90  | 21 | 905   | 0.014         | 0.014        | 0.306            |
| Northern Eyed Brown       | <i>Satyroides eurydice</i>       | 1,342   | 13  | 21 | 174   | 0.016         | 0.035        | 0.651            |
| Eastern Tailed Blue       | <i>Everes comyntas</i>           | 56,137  | 99  | 21 | 974   | 0.016         | 0.010        | 0.113            |
| Henry's Elfin             | <i>Callophrys henrici</i>        | 330     | 7   | 17 | 76    | 0.017         | 0.055        | 0.752            |



|                          |                                  |        |     |    |       |              |              |                  |
|--------------------------|----------------------------------|--------|-----|----|-------|--------------|--------------|------------------|
| Little Glassy Wing       | <i>Pompeius verna</i>            | 8,658  | 56  | 21 | 632   | 0.019        | 0.019        | 0.307            |
| Silvery Checkerspot      | <i>Chlosyne nycteis</i>          | 2,049  | 20  | 19 | 224   | 0.039        | 0.022        | 0.074            |
| Spring/Summer Azure      | <i>Celastrina ladon/neglecta</i> | 63,947 | 103 | 21 | 1,002 | <b>0.047</b> | <b>0.021</b> | <b>0.022</b>     |
| Common Buckeye           | <i>Junonia coenia</i>            | 15,771 | 73  | 19 | 834   | 0.050        | 0.067        | 0.459            |
| Pipevine Swallowtail     | <i>Battus philenor</i>           | 703    | 23  | 18 | 279   | 0.053        | 0.033        | 0.110            |
| Least Skipper            | <i>Ancyloxypha numitor</i>       | 27,506 | 84  | 21 | 844   | <b>0.053</b> | <b>0.015</b> | <b>&lt;0.001</b> |
| Appalachian Eyed Brown   | <i>Satyroides appalachia</i>     | 2,118  | 12  | 18 | 118   | 0.060        | 0.045        | 0.181            |
| Zabulon Skipper          | <i>Poanes zabulon</i>            | 10,960 | 71  | 21 | 747   | <b>0.061</b> | <b>0.022</b> | <b>0.004</b>     |
| Northern Pearly-Eye      | <i>Enodia anthedon</i>           | 2,785  | 37  | 21 | 434   | <b>0.071</b> | <b>0.020</b> | <b>&lt;0.001</b> |
| Zebra Swallowtail        | <i>Eurytides marcellus</i>       | 1,349  | 18  | 18 | 224   | <b>0.075</b> | <b>0.030</b> | <b>0.011</b>     |
| Cloudless Sulphur        | <i>Phoebis sennae</i>            | 1,840  | 27  | 19 | 355   | 0.088        | 0.057        | 0.121            |
| Common Checkered-Skipper | <i>Pyrgus communis</i>           | 3,089  | 33  | 18 | 357   | <b>0.092</b> | <b>0.046</b> | <b>0.046</b>     |
| Wild Indigo Duskywing    | <i>Erynnis baptisiae</i>         | 15,209 | 51  | 19 | 570   | <b>0.106</b> | <b>0.020</b> | <b>&lt;0.001</b> |
| Harvester                | <i>Feniseca tarquinius</i>       | 341    | 11  | 20 | 143   | <b>0.122</b> | <b>0.061</b> | <b>0.046</b>     |
| Sleepy Orange            | <i>Eurema nicippe</i>            | 2,028  | 6   | 17 | 63    | 0.146        | 0.134        | 0.276            |
| Gemmed Satyr             | <i>Cyllopsis gemma</i>           | 1,059  | 6   | 16 | 81    | <b>0.228</b> | <b>0.052</b> | <b>&lt;0.001</b> |

297 **Fig 2: The statewide relative abundance of butterflies (all species aggregated) in Ohio**  
298 **declined by 33% over 1996-2016.** Plotted are model predictions for each year based on the  
299 fixed effects of year (solid line) and annual random effects (dots) to show annual variation about  
300 the trend line. Shading shows the 95% confidence interval based on bootstrapped model fits for  
301 the temporal trend.

302  
303 **Fig 3: Statewide trends of 14 migratory species with annual variation.** Plotted are model  
304 predictions for each year based on the fixed effects of year (solid line) and annual random effects  
305 (dots) to show annual variation about the trend line. Shading shows 95% confidence intervals  
306 based on bootstrapped model fits in the *poptrend* package (43) for the temporal trend and for the  
307 annual random effects. The first year's estimate is set to a value of 1 as a baseline for relative  
308 population changes.

309  
310 **Fig 4: Statewide trends of 67 resident species with annual variation.** Plotted are model  
311 predictions for each year based on the fixed effects of year (solid line) and annual random effects  
312 (dots) to show annual variation about the trend line. Shading shows 95% confidence intervals  
313 based on bootstrapped model fits in the *poptrend* package (43) for the temporal trend and for the  
314 annual random effects. The first year's estimate is set to a value of 1 as a baseline for relative  
315 population changes.

316  
317  
318 Both in the total trend in abundance and in the proportion of species with declines, these  
319 results are similar to three European butterfly monitoring schemes (Table 3). Although the

320 longer-running programs show larger cumulative declines, the annual rate of change in total  
321 abundance ranges from -2.0% to -2.6% for Ohio, Catalonia, and the Netherlands. The United  
322 Kingdom total abundance trends are split between generalist species (-0.8%) and specialist  
323 species (-2.4%). Across monitoring programs, declining species outnumber increasing species by  
324 a factor of two to three (Table 3).  
325

326 **Table 3: Comparison of this study's results to European monitoring programs for rates of change in total abundance and**  
 327 **classification of species trends as positive or negative.** Number of sites represents those reported to contribute to the analysis, but  
 328 may no longer be active. Number of butterflies counted per year is an approximation based on the most recent years of monitoring  
 329 described in the references.

| Region (km <sup>2</sup> )      | Years                 | Sites      | Counted/year<br>(x 1000) | Annualized trend in total<br>abundance (cumulative) | Species' trends |           |                        | Reference         |
|--------------------------------|-----------------------|------------|--------------------------|-----------------------------------------------------|-----------------|-----------|------------------------|-------------------|
|                                |                       |            |                          |                                                     | Positive        | Negative  | Stable/<br>not signif. |                   |
| United Kingdom<br>(242,500)    | 41 (1976-2017)        | 3,164      | 1,700                    | -0.8% (-28%) countryside<br>-2.4% (-63%) specialist | 11              | 22        | 24                     | (51)              |
| Netherlands<br>(42,508)        | 25 (1992-2017)        | 600        | 250                      | -2.0% (-40%)                                        | 11              | 23        | 13                     | (52)              |
| Catalonia, Spain<br>(32,108)   | 22 (1994-2016)        | 116        | 122                      | -2.6% (-44%)                                        | 15              | 46        | 5                      | (40,53)           |
| <b>Ohio, USA<br/>(116,100)</b> | <b>20 (1996-2016)</b> | <b>104</b> | <b>80</b>                | <b>-2.0% (-33%)</b>                                 | <b>9</b>        | <b>32</b> | <b>40</b>              | <b>this study</b> |

330

331 In general, traits associated with species' responses to climate were more important,  
332 based on the predictive ability (adjusted  $R^2$ ) of univariate models, than traits associated with  
333 habitat and host plant restrictions (Fig 5, Tables A and B in S1 Appendix). Phylogenetic signal  
334 was included for most traits' models, so we focus on the phylogenetic generalized least squares  
335 results. The Monarch (*Danaus plexippus*) was the only migratory species in decline, although the  
336 others had erratic annual fluctuations that make trend estimation difficult (Fig 3). Species with  
337 more northern geographic ranges were associated with more negative population trends.  
338 Univoltine species had more negative population trends than bivoltine or multivoltine species.  
339 Overwintering stage did not have a strong effect on trend. Species eating forb host plants had  
340 negative trends on average, but there was no effect of host plant specialization on population  
341 trends. Wing length, wetland habitat preference, or human-disturbed habitat preference were not  
342 associated with trends.

343

344 **Fig 5: Species' traits are associated with variation in the statewide trends in abundance.** We  
345 plot each species' trend compared to the six most important traits for the 78 species included in  
346 the phylogenetic GLS models with full results in Table A in S1 Appendix. Squares represent the  
347 regression coefficients with 95% confidence intervals shown in lines. Dots show trend estimates  
348 for each species from Table 1 uncorrected for phylogeny, jittered for visualization.

349

350 Our choice of modeling approach did not change the overall evidence of defaunation.  
351 Generalized linear mixed models with Poisson-distributed errors and generalized additive mixed  
352 models estimated declines in total abundance similar in magnitude at -1.83% and -2.13% annual  
353 rates, respectively. The annual trend estimate from TRIM, without sampling covariates, was half

354 the magnitude at -0.96%. Species' trends had high correlations between pairwise comparisons,  
355 but TRIM models estimated notably more positive trends compared to the other three approaches  
356 (Table C in S1 Appendix).

357

## 358 **Discussion**

359 We show that the total butterfly abundance has declined by 33% over 20 years in Ohio.  
360 This rate is faster than the global abundance trend estimated for Lepidoptera (35% over 40 years)  
361 and corresponds more closely to the steeper declines (45% over 40 years) estimated for all  
362 insects (1). The Ohio butterfly monitoring program, judged by the weekly frequency, 20-year  
363 time period, and statewide spatial extent of its surveys, is the most extensive systematic insect  
364 survey in North America and comparable to three exemplary European butterfly monitoring  
365 schemes. The annualized 2% rate of decline in this study aligns closely with trends from  
366 European butterfly monitoring, confirming the decline of the most closely monitored group of  
367 insects in both Europe and North America (Table 3). With less known about other insect taxa,  
368 butterflies provide a necessary, if imperfect, surrogate to understand the trajectory and potential  
369 mechanisms behind broader insect trends (13). Extensive in both time and space, the decline in  
370 butterfly abundance reported here is the best estimate for the current rate of insect defaunation in  
371 North America.

372 The proportion of butterfly species with population declines compared to population  
373 increases is similar between Ohio (negative trends three times more numerous) and European  
374 studies (negative trends 2-3 times more numerous) (Table 3). In other taxa, moths in the United  
375 Kingdom show a similar proportion of species declines (68). Long-term monitoring in protected  
376 areas, although less extensive in space, shows more positive species trends for moths in Finland

377 (at 67.7° latitude) and across pollinators in Spain (at 850-1750 m. elevations) (69,70). These  
378 counterexamples show how insect communities may shift at high-latitude or high-elevation sites  
379 with anthropogenic climate warming (21) or may persist in more remote areas. However,  
380 butterfly monitoring in populated areas show a consistency in observed declines (Table 3) that  
381 we argue would generalize to other landscapes dominated by human use.

382 We demonstrate abundance declines in species that are generalist, widespread, and not  
383 considered vulnerable to extinction (25,71). Although few may share concern for the most  
384 widespread, invasive butterfly in the world's agricultural and urban settings (72), declines in  
385 *Pieris rapae* could be indicative of persistent environmental stressors that would affect other  
386 species as well. Generalist species that exploit human-disturbed habitat with annual rates of  
387 decline of more than 5% include *Lycaena phlaeas*, *Thymelicus lineola* (non-native), *Cercyonis*  
388 *pegala*, and *Colias eurytheme* (Table 2, Fig 4). We would expect negative environmental  
389 changes to disproportionately affect rare species prone to the demographic dangers of small  
390 populations or specialist species that rely on a narrow range of resources or habitat (UKBMS in  
391 Table 3, (24)). This pattern of species declines would lead to biotic homogenization as rarer  
392 species are lost and common, disturbance-tolerant species remain (73,74). However, our study  
393 adds another example of declines in common butterfly species thought to be well-suited to  
394 human-modified habitat (11,21,75).

395 The Eastern North American migratory Monarch (*Danaus plexippus*) abundance in Ohio  
396 is declining by 7% per year. The Monarch is the only declining migratory species out of 14 in  
397 our analysis. Despite disagreements about whether summer abundance trends have tracked  
398 winter colony declines (76,77), our study shows that the long-term trends correspond. However,  
399 our study's first two years have very high Monarch population indices which could be outliers

400 (Fig 3) following the two largest recorded winter population counts (16,78). With these two  
401 years removed, the statewide Monarch trend is a 4% decline per year, showing that the  
402 magnitude of summer abundance trends are sensitive to the years of data included. Our results  
403 align with a study using Illinois systematic monitoring data that shows a summer abundance  
404 decline for monarchs over two decades, but only during the period from 1994-2003, not from  
405 2004-2013(79). A more recent study showed no decline during the summer during 2004-2016  
406 using a population index from NABA counts (78). The trend we document comes from the sum  
407 of multiple summer breeding generations and fall migratory butterflies returning to Mexico;  
408 estimates of abundance for these separate generations may be required to model how different  
409 stages of the lifecycle contribute to the long-term decline in the winter colonies (78).

410 Our statewide analysis has potential limitations when used to evaluate individual species  
411 for potential conservation interventions or forecasts of population trajectories. Even with  
412 systematic monitoring, accurate estimates of insect abundance are missing from many species—a  
413 fifth of regularly observed species in Ohio did not meet our minimum data requirements to for us  
414 to estimate trends. None of these species are considered to be of conservation concern, but this  
415 also means that we would be limited in our ability to determine if their populations have reached  
416 threatened status. Targeted surveys of selected species, non-adult life stages, or rarely-sampled  
417 habitats can expand the monitoring to data-deficient species commonly excluded by protocols  
418 designed to monitor many species efficiently (51) and can be used to estimate demographic  
419 responses to environmental drivers not apparent from adult butterfly counts (80). Additional  
420 targeted species assessments could inform how worried we should be about the extreme  
421 population declines estimated for species observed at fewer than 10 monitoring sites (Table 2).  
422 However, more data and more complex population models may not always lead to accurate



423 predictions for insect population trajectories (81). Rather than recommending other systematic  
424 monitoring programs accumulate decades of data before assessing insect declines, we would  
425 advocate sharing data across regional programs to increase statistical power, as in (11), and  
426 integrating systematic monitoring with historical records and opportunistic observations to assess  
427 insect vulnerability more rapidly by using all potential sources of data (82,83).

428 Insect declines have multifaceted causes, and the relative impact of these causes is still  
429 unknown (84). Although analysis of the causes of site differences in abundance or species trends  
430 is beyond the scope of this study, we discuss three environmental drivers commonly associated  
431 with global insect declines: habitat loss and fragmentation, climate change, and agricultural  
432 intensification (84,85). If species' traits are associated with population trends, then their  
433 relationships may suggest which environmental changes affect population responses in species  
434 sharing these traits (47,84,86). In this study, life-history traits were weakly predictive of  
435 population trends, but their associations provide hypotheses that could be tested further (47).

#### 436 *Habitat loss and fragmentation*

437 In Ohio, habitat loss and fragmentation plateaued well before butterfly monitoring  
438 started, with human population growth slowing by 1970. In common with other Midwestern  
439 states, Ohio had already lost tallgrass prairie species, such as the Regal Fritillary (*Speyeria*  
440 *idalia*), due to habitat conversion to agriculture (25,26). Land-use has changed slowly over the  
441 course of the monitoring program; fewer than 10% of monitoring sites have had more than 2.5%  
442 change in the surrounding (2-km radius) developed, agriculture, or forest land cover from 2001-  
443 2011 (29). The persistence of butterfly populations in a landscape of habitat fragments are  
444 mediated by species' traits that permit them to either move between more isolated resources or  
445 persist in smaller, localized populations (85,87). Wing size is one life history trait associated

446 with dispersal ability, but it had no association with species' population trends (Tables A and B  
447 in S1 Appendix). However, defining habitat patches by land-use classes overlooks how mobile  
448 insect populations are bound by resources, varying across the lifecycle, rather than area (88,89).  
449 Although there has been little wholesale habitat conversion around our study transects,  
450 degradation of the remaining habitat could be a cause of the general decline in butterfly  
451 abundance.

#### 452 *Climate change*

453 Species trends are associated with two life-history traits, voltinism and range distribution,  
454 which suggest that the butterfly community is changing with the warming climate. Species that  
455 only complete one annual generation, or univoltine species, had more negative abundance trends.  
456 This aligns with obligate univoltine species becoming less common in Massachusetts (20), but is  
457 the opposite of the findings in Spain where multivoltine species are in steeper declines with  
458 exposure to increasingly dry summers (40). Multivoltine species may be more adaptive to annual  
459 and spatial variation in growing season length as many have plasticity in the voltinism observed  
460 within Ohio (25). For many species with flexible voltinism in Ohio, adding an extra generation  
461 in warmer summers increases their annual population growth rates (55). Northern-distributed  
462 species have more negative population trends compared to widely distributed or southern  
463 species. This corresponds with findings from Massachusetts and Europe that warm-adapted  
464 species are replacing cool-adapted species as range distributions shift (20,90). Even though these  
465 two traits should increase abundance for some species as the climate warms, it has not been  
466 enough to prevent the overall decline in butterfly abundance.

#### 467 *Agricultural intensification*

468 Cropland and pasture make up half of Ohio's land area, so we would expect agricultural  
469 practices to affect statewide insect abundance. One assessment of pollinator habitat suitability  
470 based on land-use, conservation reserve program acreage, and crop type estimated an increase in  
471 resources in Ohio from 1982 through 2002, followed by a stable trend (91). However,  
472 agricultural practices can decrease insect abundance with systemic insecticides, herbicide use on  
473 host plants or nectar resources, and nitrogen fertilization that alters the composition of  
474 surrounding plant communities.

475 In Ohio, the use of neonicotinoids rapidly increased after 2004 when they became widely  
476 used on corn and soybeans (92,93). The mechanistic link between neonicotinoid insecticides and  
477 insect declines is established and observational studies have shown widespread impacts of their  
478 use (94–96). Even though seed-coatings with neonicotinoids reduce broadcast spraying, the  
479 mechanical planting of these seeds exposes widespread areas around farms to contaminated dust  
480 that exposes non-target plants and insects to biologically-relevant concentrations (97,98). In the  
481 United Kingdom and California, neonicotinoids are associated with butterfly declines (22,99)  
482 and hinder butterfly larval development on host plants (100). We did not design this study to test  
483 whether neonicotinoids affect butterfly abundance in Ohio. However, the observed declines  
484 across common and generalist species, which we otherwise would expect to exploit an  
485 agricultural or human-altered landscape, would be consistent with widespread exposure to  
486 insecticides.

487 Species that eat forbs as larvae have negative population trends (Fig 5). Both herbicide  
488 use and nitrogen deposition may alter plant communities to favor grasses over forbs (101). In  
489 Ohio, glyphosate use has increased linearly, and is now applied at 6 times the rate it was in 1996  
490 (92,93). Milkweed losses, attributed to increased glyphosate use in the Midwest, contribute to

491 declines in Monarch butterfly abundance (79,80). Nitrogen increases, which may come from  
492 fertilization or atmospheric deposition, have been linked to declines in grassland butterfly  
493 species adapted to low-nitrogen environments (102–104) and to higher mortality during larval  
494 development on enriched host plants (105).

495

## 496 **Conclusions**

497         Systematic, long-term surveys of butterflies provide the most rigorous estimate for the  
498 rate of insect declines. This study demonstrates that defaunation is happening in North America  
499 similarly to Europe. In landscapes comprising natural areas amid heavy human land-use,  
500 butterfly total abundance is declining at 2% per year and 2-3 times more species have population  
501 trends declining rather than increasing. Additional Pollard-based monitoring programs in North  
502 America, listed in (9), will enable tracking insect trends over larger spatial extents as will efforts  
503 to integrate data across European monitoring schemes (11). The rates for other insect groups may  
504 deviate from this baseline and were previously estimated to be declining more rapidly than  
505 Lepidoptera (1). Expanded monitoring and support for taxonomists are imperative for other taxa  
506 and under sampled regions, like the Tropics where most insect diversity resides. Besides the  
507 evaluation if butterfly trends generalize to other insects, the most urgent research needs are  
508 understanding the causes of decline and testing mitigation strategies. As butterflies are the best-  
509 monitored insect taxa, they are the best indicator of the baseline threat to the 5.5 million insect  
510 species, the most diverse group of animals on earth.

511

## 512 **Acknowledgments**

513 We thank the volunteers and directors who contribute their time and expertise to the Ohio  
514 butterfly monitoring program. The Ohio Department of Natural Resources provides support, the  
515 Cleveland Museum of Natural History provides data entry and archiving, and the Ohio  
516 Lepidopterists provides training and coordination for the Ohio butterfly monitoring program. We  
517 thank Marjorie Weber for advice on our phylogenetic analysis. The Department of the Interior  
518 Southeast Climate Adaptation Science Center and North Carolina State University supported TW  
519 during earlier work with Ohio butterflies that grew into this analysis.

520

## 521 **References**

- 522 1. Dirzo R, Young HS, Galetti M, Ceballos G, Isaac NJB, Collen B. Defaunation in the  
523 Anthropocene. *Science*. 2014 Jul 25;345(6195):401–6.
- 524 2. May RM. How many species are there on earth? *Science*. 1988;241(4872):1441–1449.
- 525 3. Conrad KF, Fox R, Woiwod IP. Monitoring biodiversity: measuring long-term changes in  
526 insect abundance. *Insect Conserv Biol*. 2007;203–225.
- 527 4. Hallmann CA, Sorg M, Jongejans E, Siepel H, Hofland N, Schwan H, et al. More than 75  
528 percent decline over 27 years in total flying insect biomass in protected areas. Lamb EG,  
529 editor. *PLOS ONE*. 2017 Oct 18;12(10):e0185809.
- 530 5. Lister BC, Garcia A. Climate-driven declines in arthropod abundance restructure a  
531 rainforest food web. *Proc Natl Acad Sci*. 2018 Oct 30;115(44):E10397–406.
- 532 6. Winfree R, W. Fox J, Williams NM, Reilly JR, Cariveau DP. Abundance of common  
533 species, not species richness, drives delivery of a real-world ecosystem service. Shea K,  
534 editor. *Ecol Lett*. 2015 Jul;18(7):626–35.

- 535 7. Warren MS, Hill JK, Thomas JA, Asher J, Fox R, Huntley B, et al. Rapid responses of  
536 British butterflies to opposing forces of climate and habitat change. 2001;414:5.
- 537 8. Parmesan C. Ecological and Evolutionary Responses to Recent Climate Change. *Annu*  
538 *Rev Ecol Evol Syst.* 2006 Dec;37(1):637–69.
- 539 9. Taron D, Ries L. Butterfly Monitoring for Conservation. In: Daniels JC, editor. *Butterfly*  
540 *Conservation in North America* [Internet]. Dordrecht: Springer Netherlands; 2015 [cited  
541 2018 Dec 7]. p. 35–57. Available from: [http://link.springer.com/10.1007/978-94-017-](http://link.springer.com/10.1007/978-94-017-9852-5_3)  
542 [9852-5\\_3](http://link.springer.com/10.1007/978-94-017-9852-5_3)
- 543 10. Pollard E, Yates TJ. *Monitoring butterflies for ecology and conservation: the British*  
544 *butterfly monitoring scheme.* Springer Science & Business Media; 1994.
- 545 11. Van Swaay C, Van Strien A, Aghababayan K, Astrom S, Botham M, Brereton T, et al. *The*  
546 *European Butterfly Indicator for Grassland species: 1990-2013.* 2015;
- 547 12. Schmucki R, Pe'er G, Roy DB, Stefanescu C, Van Swaay CAM, Oliver TH, et al. A  
548 regionally informed abundance index for supporting integrative analyses across butterfly  
549 monitoring schemes. Müller J, editor. *J Appl Ecol.* 2016 Apr;53(2):501–10.
- 550 13. Thomas JA. Monitoring change in the abundance and distribution of insects using  
551 butterflies and other indicator groups. *Philos Trans R Soc B Biol Sci.* 2005 Feb  
552 28;360(1454):339–57.
- 553 14. Brereton T, Roy DB, Middlebrook I, Botham M, Warren M. The development of butterfly  
554 indicators in the United Kingdom and assessments in 2010. *J Insect Conserv.* 2011  
555 Apr;15(1–2):139–51.
- 556 15. Dennis EB, Morgan BJT, Roy DB, Brereton TM. Urban indicators for UK butterflies.  
557 *Ecol Indic.* 2017 May;76:184–93.

- 558 16. Agrawal AA, Inamine H. Mechanisms behind the monarch's decline. *Science*.  
559 2018;360(6395):1294–1296.
- 560 17. Schultz CB, Brown LM, Pelton E, Crone EE. Citizen science monitoring demonstrates  
561 dramatic declines of monarch butterflies in western North America. *Biol Conserv*.  
562 2017;214:343–346.
- 563 18. Belitz MW, Hendrick LK, Monfils MJ, Cuthrell DL, Marshall CJ, Kawahara AY, et al.  
564 Aggregated occurrence records of the federally endangered Poweshiek skipperling  
565 (*Oarisma poweshiek*). *Biodivers Data J*. 2018;(6).
- 566 19. Haddad NM. Resurrection and resilience of the rarest butterflies. *PLOS Biol*. 2018 Feb  
567 6;16(2):e2003488.
- 568 20. Breed GA, Stichter S, Crone EE. Climate-driven changes in northeastern US butterfly  
569 communities. *Nat Clim Change*. 2013 Feb;3(2):142–5.
- 570 21. Forister ML, McCall AC, Sanders NJ, Fordyce JA, Thorne JH, O'Brien J, et al.  
571 Compounded effects of climate change and habitat alteration shift patterns of butterfly  
572 diversity. *Proc Natl Acad Sci*. 2010 Feb 2;107(5):2088–92.
- 573 22. Forister ML, Cousens B, Harrison JG, Anderson K, Thorne JH, Waetjen D, et al.  
574 Increasing neonicotinoid use and the declining butterfly fauna of lowland California. *Biol*  
575 *Lett*. 2016 Aug;12(8):20160475.
- 576 23. Schlicht D, Swengel A, Swengel S. Meta-analysis of survey data to assess trends of prairie  
577 butterflies in Minnesota, USA during 1979–2005. *J Insect Conserv*. 2009 Aug;13(4):429–  
578 47.
- 579 24. Swengel SR, Schlicht D, Olsen F, Swengel AB. Declines of prairie butterflies in the  
580 midwestern USA. *J Insect Conserv*. 2011 Apr;15(1–2):327–39.

- 581 25. Iftner DC, Shuey JA, Calhoun JV. Butterflies and skippers of Ohio. College of Biological  
582 Sciences, Ohio State University; 1992.
- 583 26. Shuey JA, Calhoun JV, Iftner DC. Butterflies that are endangered, threatened, and of  
584 special concern in Ohio. 1987;
- 585 27. Bigelow D, Borchers A. Major uses of land in the United States, 2012. 2017.
- 586 28. Thornton PE, Running SW, White MA. Generating surfaces of daily meteorological  
587 variables over large regions of complex terrain. *J Hydrol.* 1997 Mar;190(3–4):214–51.
- 588 29. Homer C, Dewitz J, Yang L, Jin S, Danielson P, Xian G, et al. Completion of the 2011  
589 National Land Cover Database for the conterminous United States—representing a decade  
590 of land cover change information. *Photogramm Eng Remote Sens.* 2015;81(5):345–354.
- 591 30. Diamond SE, Cayton H, Wepprich T, Jenkins CN, Dunn RR, Haddad NM, et al.  
592 Unexpected phenological responses of butterflies to the interaction of urbanization and  
593 geographic temperature. *Ecology.* 2014 Sep;95(9):2613–21.
- 594 31. Dennis EB, Freeman SN, Brereton T, Roy DB. Indexing butterfly abundance whilst  
595 accounting for missing counts and variability in seasonal pattern. O’Hara RB, editor.  
596 *Methods Ecol Evol.* 2013 Jul;4(7):637–45.
- 597 32. Opler PA, Krizek GO. Butterflies east of the Great Plains: an illustrated natural history.  
598 Johns Hopkins Univ Pr; 1984.
- 599 33. Dennis EB, Morgan BJT, Freeman SN, Brereton TM, Roy DB. A generalized abundance  
600 index for seasonal invertebrates: A Generalized Abundance Index for Seasonal  
601 Invertebrates. *Biometrics.* 2016 Dec;72(4):1305–14.
- 602 34. Wood SN. Generalized Additive Models: An Introduction with R. 2nd ed. Chapman and  
603 Hall/CRC; 2017.



- 604 35. Cordano EE& E. Interpol.T: Hourly interpolation of multiple temperature daily series  
605 [Internet]. 2013. Available from: <https://CRAN.R-project.org/package=Interpol.T>
- 606 36. Cayton HL, Haddad NM, Gross K, Diamond SE, Ries L. Do growing degree days predict  
607 phenology across butterfly species? *Ecology*. 2015 Jun;96(6):1473–9.
- 608 37. Link WA, Sauer JR. Estimating Population Change from Count Data: Application to the  
609 North American Breeding Bird Survey. *Ecol Appl*. 1998 May;8(2):258.
- 610 38. Pellet J, Bried JT, Parietti D, Gander A, Heer PO, Cherix D, et al. Monitoring Butterfly  
611 Abundance: Beyond Pollard Walks. Schweiger O, editor. *PLoS ONE*. 2012 Jul  
612 30;7(7):e41396.
- 613 39. Henry EH, Anderson CT. Abundance estimates to inform butterfly management: double-  
614 observer versus distance sampling. *J Insect Conserv*. 2016 Jun;20(3):505–14.
- 615 40. Melero Y, Stefanescu C, Pino J. General declines in Mediterranean butterflies over the last  
616 two decades are modulated by species traits. *Biol Conserv*. 2016 Sep;201:336–42.
- 617 41. Haddad NM, Hudgens B, Damiani C, Gross K, Kuefler D, Pollock K. Determining  
618 Optimal Population Monitoring for Rare Butterflies: *Monitoring Rare Butterflies*. *Conserv*  
619 *Biol*. 2008 Aug;22(4):929–40.
- 620 42. Isaac NJB, Cruickshanks KL, Weddle AM, Marcus Rowcliffe J, Brereton TM, Dennis  
621 RLH, et al. Distance sampling and the challenge of monitoring butterfly populations:  
622 Distance sampling and monitoring butterflies. *Methods Ecol Evol*. 2011 Dec;2(6):585–94.
- 623 43. Knappe J. Decomposing trends in Swedish bird populations using generalized additive  
624 mixed models. Siriwardena G, editor. *J Appl Ecol*. 2016 Dec;53(6):1852–61.

- 625 44. Szabo JK, Vesk PA, Baxter PWJ, Possingham HP. Regional avian species declines  
626 estimated from volunteer-collected long-term data using List Length Analysis. *Ecol Appl.*  
627 2010;20(8):2157–69.
- 628 45. van Strien AJ, van Swaay CAM, Termaat T. Opportunistic citizen science data of animal  
629 species produce reliable estimates of distribution trends if analysed with occupancy  
630 models. Devictor V, editor. *J Appl Ecol.* 2013 Dec;50(6):1450–8.
- 631 46. Roy DB, Ploquin EF, Randle Z, Risely K, Botham MS, Middlebrook I, et al. Comparison  
632 of trends in butterfly populations between monitoring schemes. *J Insect Conserv.* 2015  
633 Apr;19(2):313–24.
- 634 47. Soykan CU, Sauer J, Schuetz JG, LeBaron GS, Dale K, Langham GM. Population trends  
635 for North American winter birds based on hierarchical models. *Ecosphere.*  
636 2016;7(5):e01351.
- 637 48. Kraemer HC, Blasey CM. Centring in regression analyses: a strategy to prevent errors in  
638 statistical inference. *Int J Methods Psychiatr Res.* 2004;13(3):141–51.
- 639 49. Harrison XA. Using observation-level random effects to model overdispersion in count  
640 data in ecology and evolution. *PeerJ.* 2014 Oct 9;2:e616.
- 641 50. Pannekoek J, Van Strien A. Trim 3 Manual (TRends & Indices for Monitoring data)–  
642 Statistics Netherlands. Voorburg; 2001.
- 643 51. Brereton T, Botham M, Middlebrook I, Randle Z, Noble D, Harris S, et al. United  
644 Kingdom Butterfly Monitoring Scheme report for 2017. Centre for Ecology & Hydrology  
645 & Butterfly Conservation; 2018.
- 646 52. Van Swaay CAM, Bos G, Van Grunsven RHA, Kok J, Huskens K, Van Deijk JR, et al.  
647 Vlinders en libellen geteld: Jaarverslag 2017 [Internet]. De Vlinderstichting, Wageningen;

- 648 2018 [cited 2019 Feb 14]. Report No.: Rapport VS2018.006. Available from:  
649 <https://assets.vlinderstichting.nl/docs/6d51f174-b497-4777-b84a-362e344c3528.pdf>
- 650 53. Stefanescu C. Resum de les temporades 2015 i 2016. Cynthia Butlletí Butterfly Monit  
651 Scheme Catalunya [Internet]. 2018 [cited 2019 Feb 14];14. Available from:  
652 <http://www.catalanbms.org/es/cynthia/>
- 653 54. Rohatgi A. WebPlotDigitizer. 2011.
- 654 55. Wepprich TM. Effects of Climatic Variability on a Statewide Butterfly Community. North  
655 Carolina State University; 2017.
- 656 56. Diamond SE, Frame AM, Martin RA, Buckley LB. Species' traits predict phenological  
657 responses to climate change in butterflies. 2011;92(5):8.
- 658 57. Pagel M. Inferring the historical patterns of biological evolution. Nature. 1999  
659 Oct;401(6756):877–84.
- 660 58. Clark K, Karsch-Mizrachi I, Lipman DJ, Ostell J, Sayers EW. GenBank. Nucleic Acids  
661 Res. 2016 Jan 4;44(Database issue):D67–72.
- 662 59. Ratnasingham S, Hebert PD. BOLD: The Barcode of Life Data System ([http://www.  
663 barcodinglife.org](http://www.barcodinglife.org)). Mol Ecol Notes. 2007;7(3):355–364.
- 664 60. Espeland M, Breinholt J, Willmott KR, Warren AD, Vila R, Toussaint EFA, et al. A  
665 Comprehensive and Dated Phylogenomic Analysis of Butterflies. Curr Biol. 2018  
666 Mar;28(5):770-778.e5.
- 667 61. R Core Team. R: A Language and Environment for Statistical Computing [Internet].  
668 Vienna, Austria: R Foundation for Statistical Computing; 2018. Available from:  
669 <https://www.R-project.org/>

- 670 62. Bates D, Mächler M, Bolker B, Walker S. Fitting Linear Mixed-Effects Models Using  
671 **lme4**. J Stat Softw [Internet]. 2015 [cited 2018 Dec 4];67(1). Available from:  
672 <http://www.jstatsoft.org/v67/i01/>
- 673 63. Orme D, Freckleton R, Thomas G, Petzoldt T. The caper package: comparative analysis of  
674 phylogenetics and evolution in R. R Package Version. 2013;5(2).
- 675 64. Paradis E, Schliep K. ape 5.0: an environment for modern phylogenetics and evolutionary  
676 analyses in R. Bioinformatics. 2018;xx:xxx–xxx.
- 677 65. Knowles JE, Frederick C. merTools: Tools for Analyzing Mixed Effect Regression  
678 Models [Internet]. 2018. Available from: <https://CRAN.R-project.org/package=merTools>
- 679 66. Nakagawa S, Schielzeth H. A general and simple method for obtaining  $R^2$  from  
680 generalized linear mixed-effects models. O’Hara RB, editor. Methods Ecol Evol. 2013  
681 Feb;4(2):133–42.
- 682 67. Barton K. MuMIn: Multi-Model Inference [Internet]. 2018. Available from:  
683 <https://CRAN.R-project.org/package=MuumIn>
- 684 68. Conrad KF, Woiwod IP, Parsons M, Fox R, Warren MS. Long-term population trends in  
685 widespread British moths. J Insect Conserv. 2004;8(2–3):119–136.
- 686 69. Hunter MD, Kozlov MV, Itämies J, Pulliainen E, Bäck J, Kyrö E-M, et al. Current  
687 temporal trends in moth abundance are counter to predicted effects of climate change in an  
688 assemblage of subarctic forest moths. Glob Change Biol. 2014 Jun;20(6):1723–37.
- 689 70. Herrera CM. Complex long-term dynamics of pollinator abundance in undisturbed  
690 Mediterranean montane habitats over two decades. Ecol Monogr. 2019 Feb  
691 1;89(1):e01338.
- 692 71. Cech R, Tudor G, others. Butterflies of the east coast. Princeton University Press; 2005.

- 693 72. Ryan SF, Lombaert E, Espeset A, Vila R, Talavera G, Dincă V, et al. Global invasion  
694 history of the world's most abundant pest butterfly: a citizen science population genomics  
695 study. *bioRxiv*. 2018 Dec 26;506162.
- 696 73. McKinney ML, Lockwood JL. Biotic homogenization: a few winners replacing many  
697 losers in the next mass extinction. *Trends Ecol Evol*. 1999;14(11):450–453.
- 698 74. Clavel J, Julliard R, Devictor V. Worldwide decline of specialist species: toward a global  
699 functional homogenization? *Front Ecol Environ*. 2011;9(4):222–8.
- 700 75. Van Dyck H, Van Strien AJ, Maes D, Van Swaay CAM. Declines in Common,  
701 Widespread Butterflies in a Landscape under Intense Human Use. *Conserv Biol*. 2009  
702 Aug;23(4):957–65.
- 703 76. Ries L, Oberhauser K, Taron D, Battin J, Rendon-Salinas E, Altizer S, et al. Connecting  
704 eastern monarch population dynamics across their migratory cycle. *Monarchs Chang  
705 World Biol Conserv Iconic Insect Cornell Univ Press Ithaca NY*. 2015;268–281.
- 706 77. Pleasants JM, Williams EH, Brower LP, Oberhauser KS, Taylor OR. Conclusion of No  
707 Decline in Summer Monarch Population Not Supported. *Ann Entomol Soc Am*. 2016 Mar  
708 1;109(2):169–71.
- 709 78. Saunders SP, Ries L, Neupane N, Ramírez MI, García-Serrano E, Rendón-Salinas E, et al.  
710 Multiscale seasonal factors drive the size of winter monarch colonies. *Proc Natl Acad Sci*.  
711 2019 Mar 18;201805114.
- 712 79. Saunders SP, Ries L, Oberhauser KS, Thogmartin WE, Zipkin EF. Local and cross-  
713 seasonal associations of climate and land use with abundance of monarch butterflies  
714 *Danaus plexippus*. *Ecography*. 2018 Feb;41(2):278–90.

- 715 80. Pleasants JM, Oberhauser KS. Milkweed loss in agricultural fields because of herbicide  
716 use: effect on the monarch butterfly population: *Herbicide use and monarch butterflies*.  
717 *Insect Conserv Divers*. 2013 Mar;6(2):135–44.
- 718 81. Oliver TH, Roy DB. The pitfalls of ecological forecasting. *Biol J Linn Soc*. 2015  
719 Jul;115(3):767–78.
- 720 82. Dennis EB, Morgan BJ, Brereton TM, Roy DB, Fox R. Using citizen science butterfly  
721 counts to predict species population trends. *Conserv Biol*. 2017;31(6):1350–1361.
- 722 83. Pagel J, Anderson BJ, O’Hara RB, Cramer W, Fox R, Jeltsch F, et al. Quantifying range-  
723 wide variation in population trends from local abundance surveys and widespread  
724 opportunistic occurrence records. McMahon S, editor. *Methods Ecol Evol*. 2014  
725 Aug;5(8):751–60.
- 726 84. Fox R. The decline of moths in Great Britain: a review of possible causes: *The decline of*  
727 *moths in Great Britain*. *Insect Conserv Divers*. 2013 Jan;6(1):5–19.
- 728 85. Thomas JA. Butterfly communities under threat. *Science*. 2016 Jul 15;353(6296):216–8.
- 729 86. Wong MKL, Guénard B, Lewis OT. Trait-based ecology of terrestrial arthropods. *Biol*  
730 *Rev [Internet]*. 2018 [cited 2018 Dec 14];0(0). Available from:  
731 <https://onlinelibrary.wiley.com/doi/abs/10.1111/brv.12488>
- 732 87. Habel JC, Schmitt T. Vanishing of the common species: Empty habitats and the role of  
733 genetic diversity. *Biol Conserv*. 2018 Feb;218:211–6.
- 734 88. Dennis RLH, Shreeve TG, Dyck HV. Towards a Functional Resource-Based Concept for  
735 Habitat: A Butterfly Biology Viewpoint. *Oikos*. 2003;102(2):417–26.

- 736 89. Curtis RJ, Brereton TM, Dennis RLH, Carbone C, Isaac NJB. Butterfly abundance is  
737 determined by food availability and is mediated by species traits. Diamond S, editor. *J*  
738 *Appl Ecol*. 2015 Dec;52(6):1676–84.
- 739 90. Parmesan C, Ryrholm N, Stefanescu C, Hill JK, Thomas CD, Descimon H, et al. Poleward  
740 shifts in geographical ranges of butterfly species associated with regional warming.  
741 *Nature*. 1999 Jun;399(6736):579–83.
- 742 91. Hellerstein D. Land Use, Land Cover, and Pollinator Health: A Review and Trend  
743 Analysis. :47.
- 744 92. Baker NT, Stone WW. Estimated annual agricultural pesticide use for counties of the  
745 conterminous United States, 2008–12: U.S. Geological Survey Data Series 907 [Internet].  
746 US Geological Survey; p. 9. (U.S. Geological Survey Data Series 907). Available from:  
747 <https://dx.doi.org/10.3133/ds907>.
- 748 93. Stone WW. Estimated annual agricultural pesticide use for counties of the conterminous  
749 United States, 1992–2009. US Geological Survey; 2013. (U.S. Geological Survey Data  
750 Series 752).
- 751 94. Goulson D. REVIEW: An overview of the environmental risks posed by neonicotinoid  
752 insecticides. Kleijn D, editor. *J Appl Ecol*. 2013 Aug;50(4):977–87.
- 753 95. Hallmann CA, Foppen RPB, van Turnhout CAM, de Kroon H, Jongejans E. Declines in  
754 insectivorous birds are associated with high neonicotinoid concentrations. *Nature*. 2014  
755 Jul;511(7509):341–3.
- 756 96. Pisa L, Goulson D, Yang E-C, Gibbons D, Sánchez-Bayo F, Mitchell E, et al. An update  
757 of the Worldwide Integrated Assessment (WIA) on systemic insecticides. Part 2: impacts

- 758 on organisms and ecosystems. *Environ Sci Pollut Res* [Internet]. 2017 Nov 9 [cited 2019  
759 Feb 1]; Available from: <https://doi.org/10.1007/s11356-017-0341-3>
- 760 97. Douglas MR, Tooker JF. Large-Scale Deployment of Seed Treatments Has Driven Rapid  
761 Increase in Use of Neonicotinoid Insecticides and Preemptive Pest Management in U.S.  
762 Field Crops. *Environ Sci Technol*. 2015 Apr 21;49(8):5088–97.
- 763 98. Krupke CH, Holland JD, Long EY, Eitzer BD. Planting of neonicotinoid-treated maize  
764 poses risks for honey bees and other non-target organisms over a wide area without  
765 consistent crop yield benefit. Diamond S, editor. *J Appl Ecol*. 2017 Oct;54(5):1449–58.
- 766 99. Gilburn AS, Bunnefeld N, Wilson JM, Botham MS, Brereton TM, Fox R, et al. Are  
767 neonicotinoid insecticides driving declines of widespread butterflies? *PeerJ*. 2015 Nov  
768 24;3:e1402.
- 769 100. Basley K, Goulson D. Effects of Field-Relevant Concentrations of Clothianidin on Larval  
770 Development of the Butterfly *Polyommatus icarus* (Lepidoptera, Lycaenidae). *Environ Sci*  
771 *Technol*. 2018 Apr 3;52(7):3990–6.
- 772 101. Kleijn D, Snoeiijing GIJ. Field Boundary Vegetation and the Effects of Agrochemical  
773 Drift: Botanical Change Caused by Low Levels of Herbicide and Fertilizer. *J Appl Ecol*.  
774 1997;34(6):1413–25.
- 775 102. Weiss SB. Cars, cows, and checkerspot butterflies: nitrogen deposition and management  
776 of nutrient-poor grasslands for a threatened species. *Conserv Biol*. 1999;13(6):1476–1486.
- 777 103. Öckinger E, Hammarstedt O, Nilsson SG, Smith HG. The relationship between local  
778 extinctions of grassland butterflies and increased soil nitrogen levels. *Biol Conserv*. 2006  
779 Apr 1;128(4):564–73.



- 780 104. WallisDeVries MF, van Swaay CAM. A nitrogen index to track changes in butterfly  
781 species assemblages under nitrogen deposition. *Biol Conserv.* 2017 Aug;212:448–53.
- 782 105. Kurze S, Heinken T, Fartmann T. Nitrogen enrichment in host plants increases the  
783 mortality of common Lepidoptera species. *Oecologia.* 2018 Dec;188(4):1227–37.

784

785 **S1 Appendix. Supplementary methods and results.** Includes detailed methods for phenology  
786 models and phylogenetic trees, a figure of species trends plotted on a cladogram, two tables of  
787 model results from the trait analysis, and a table comparing our trend estimates with three other  
788 approaches.

789

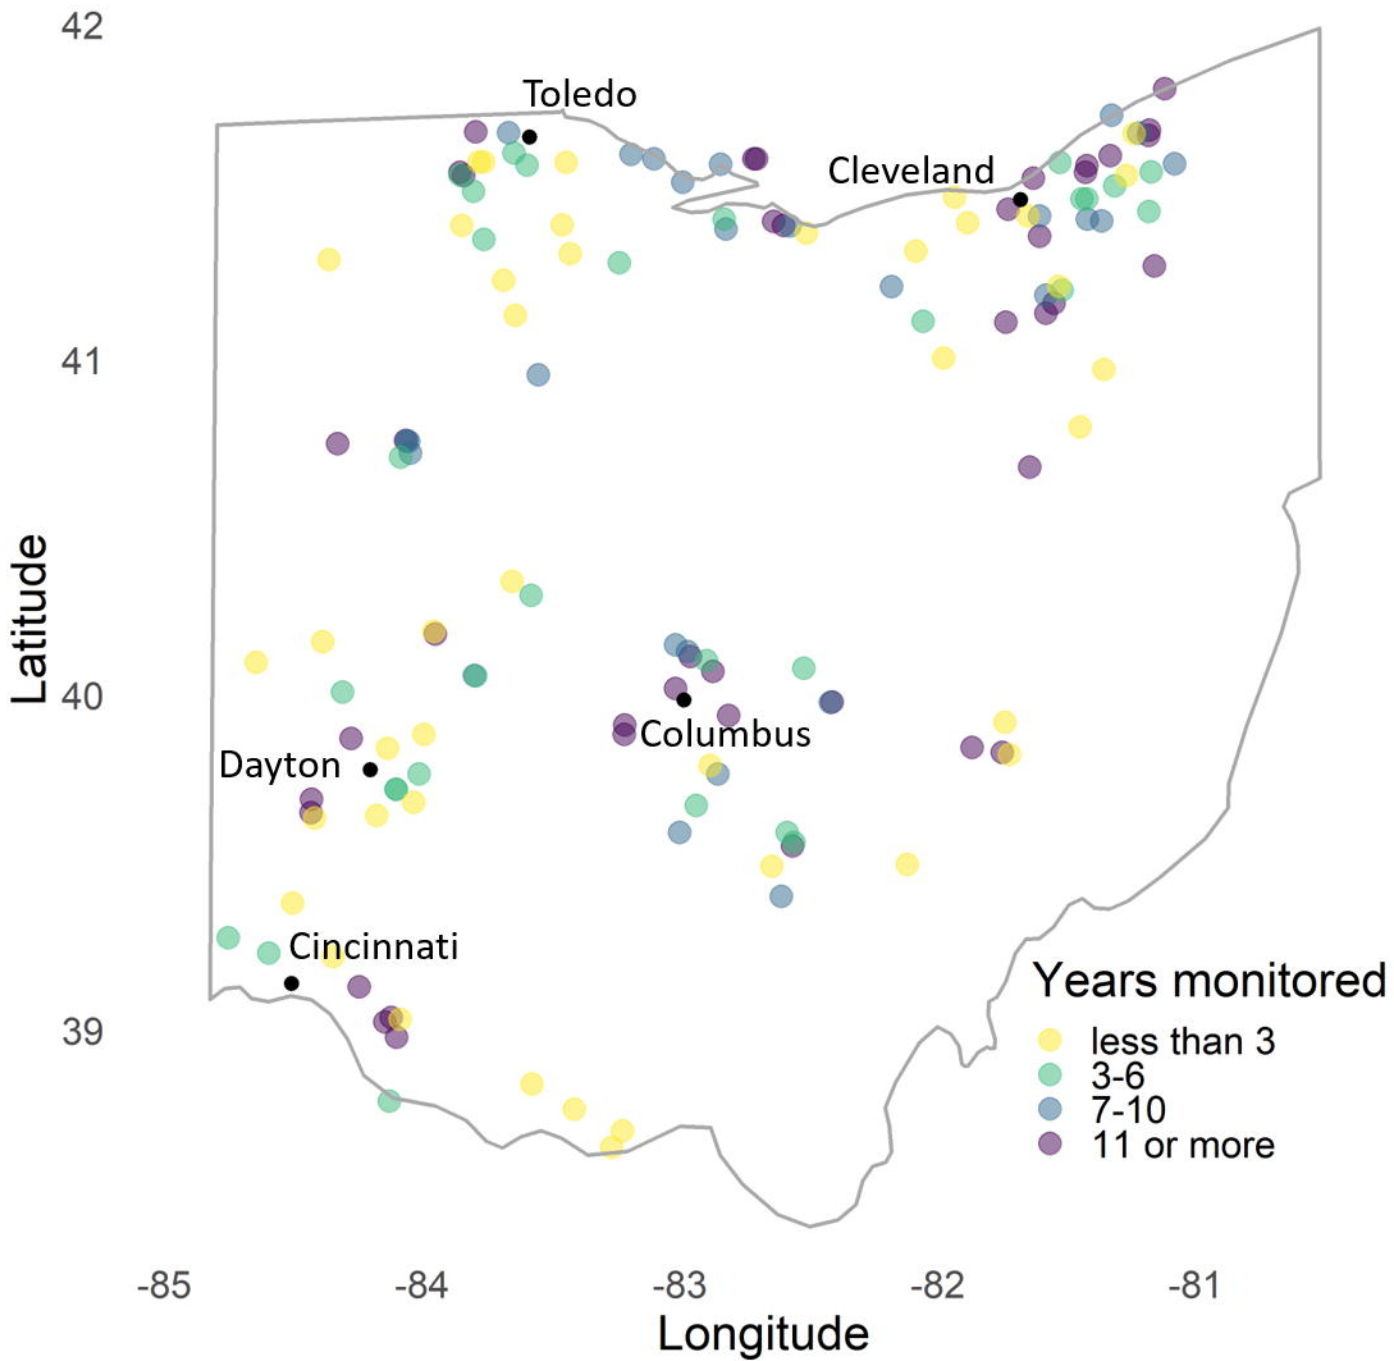

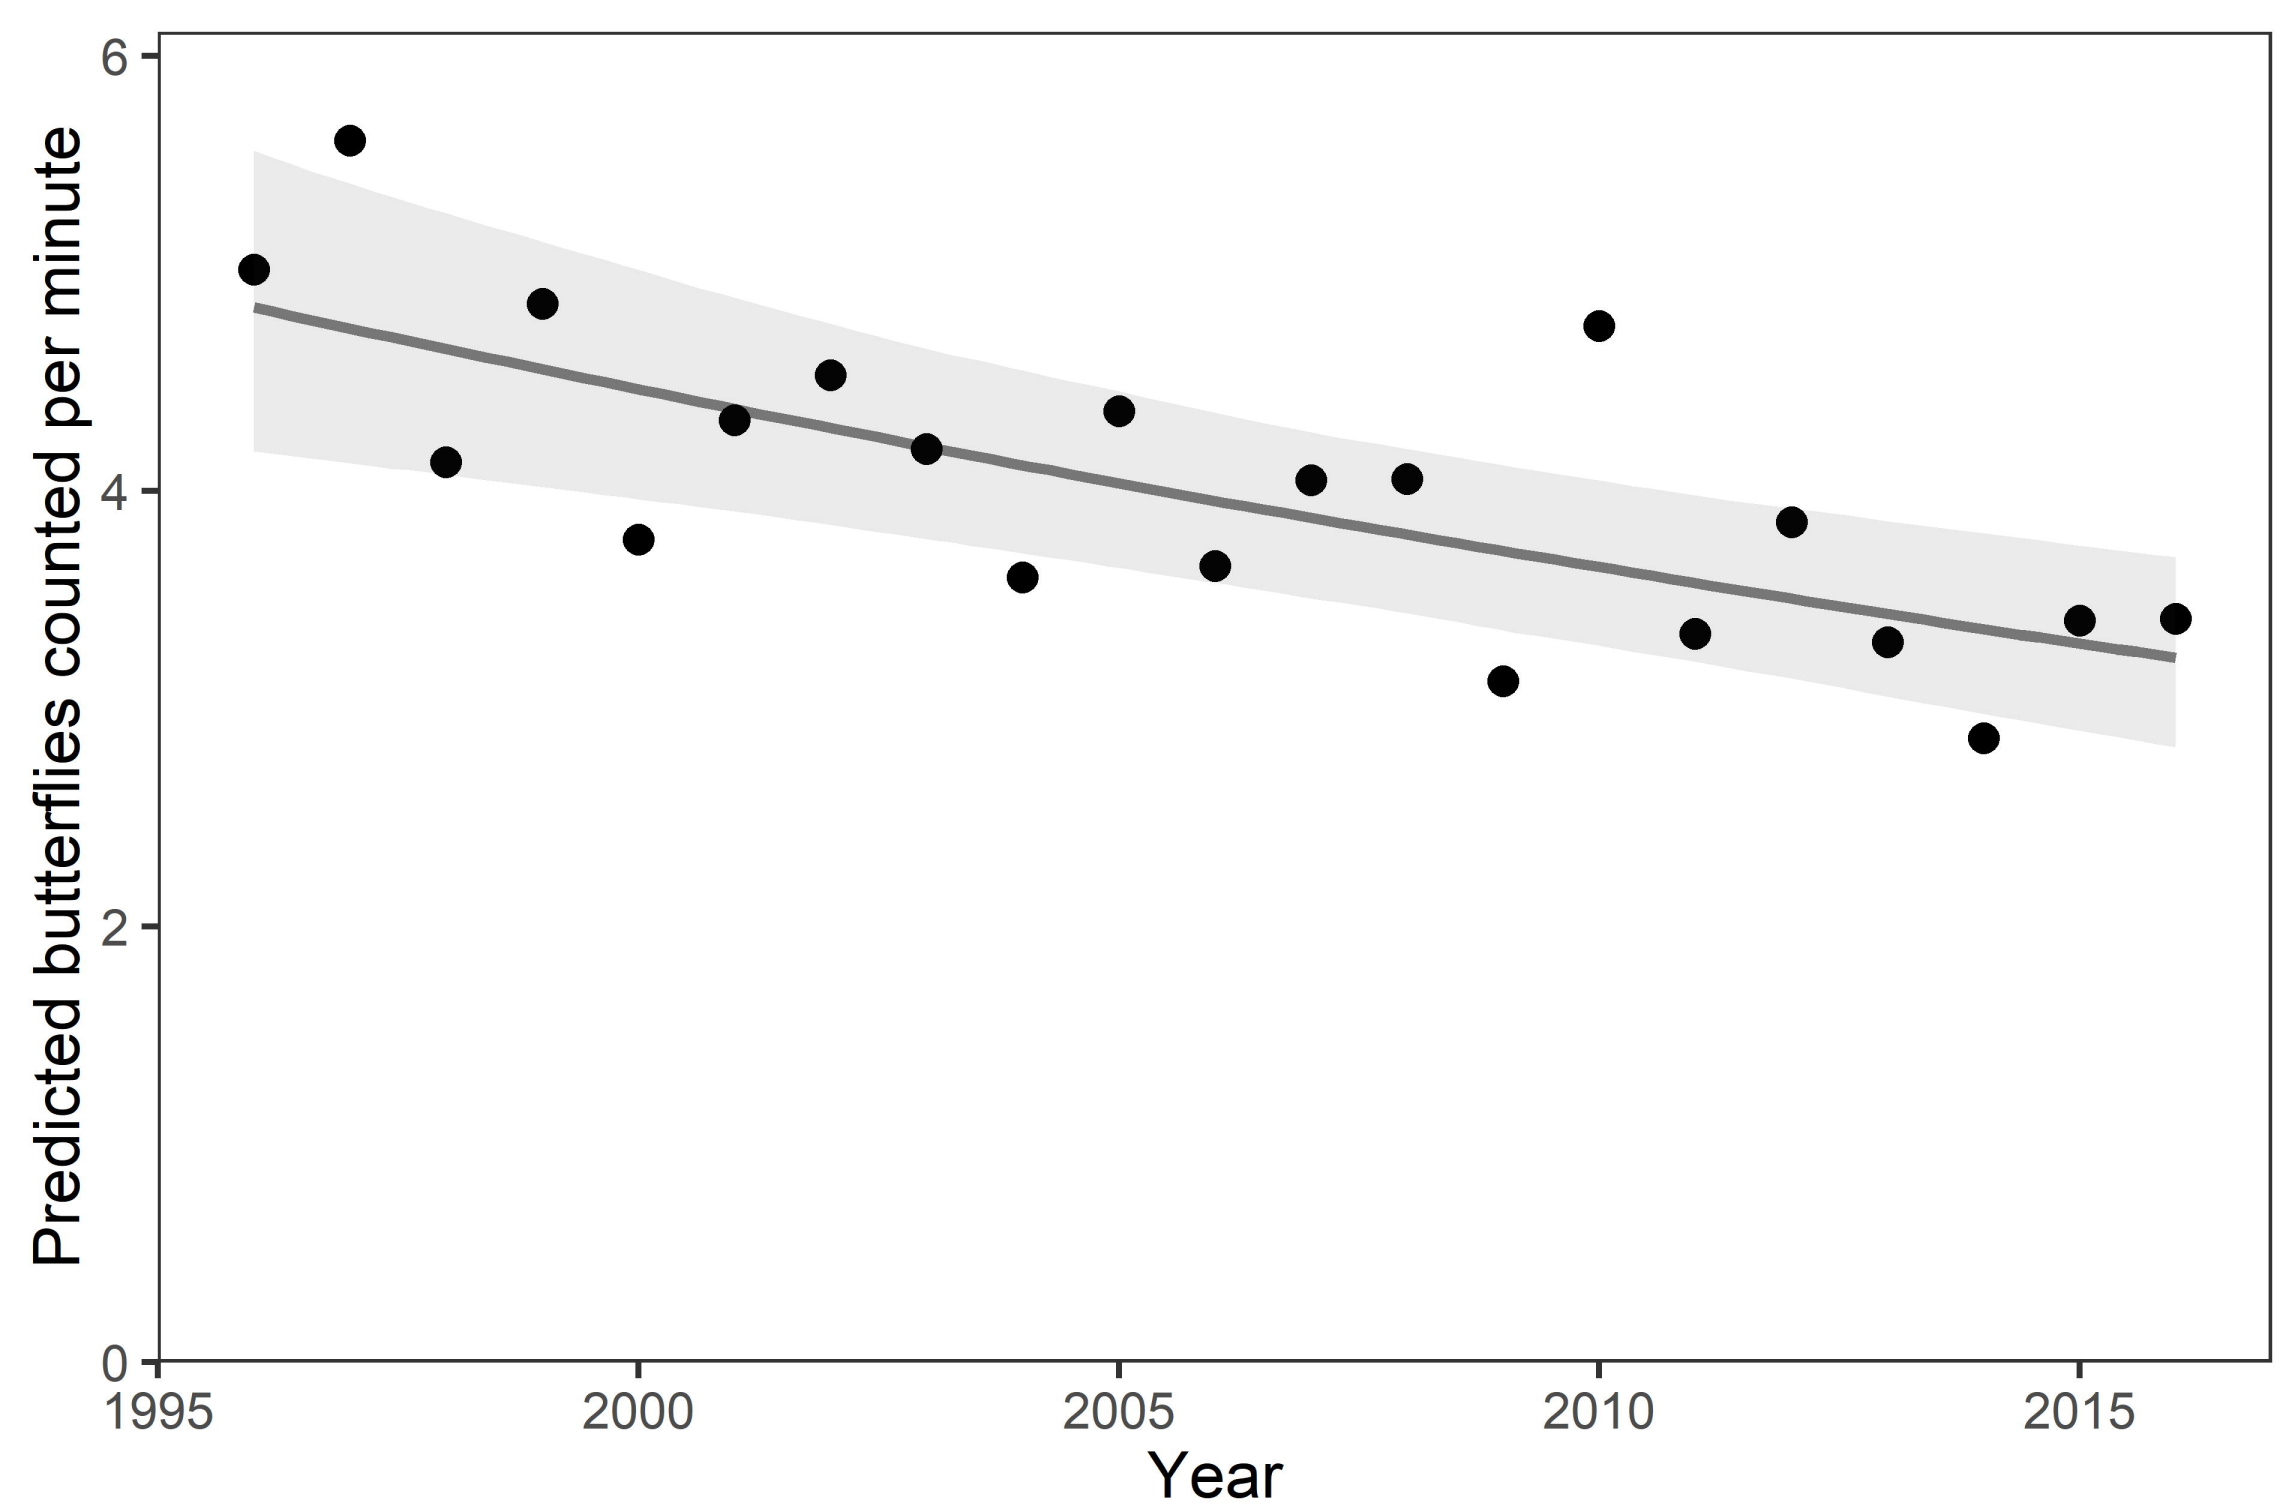

Change in relative abundance index

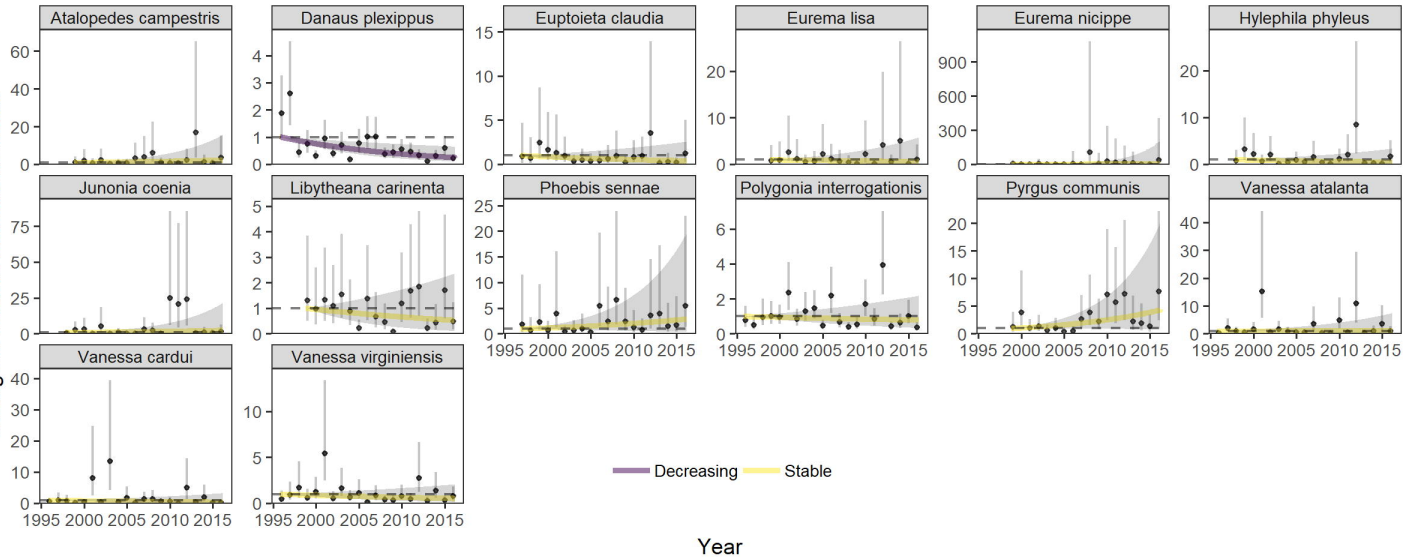

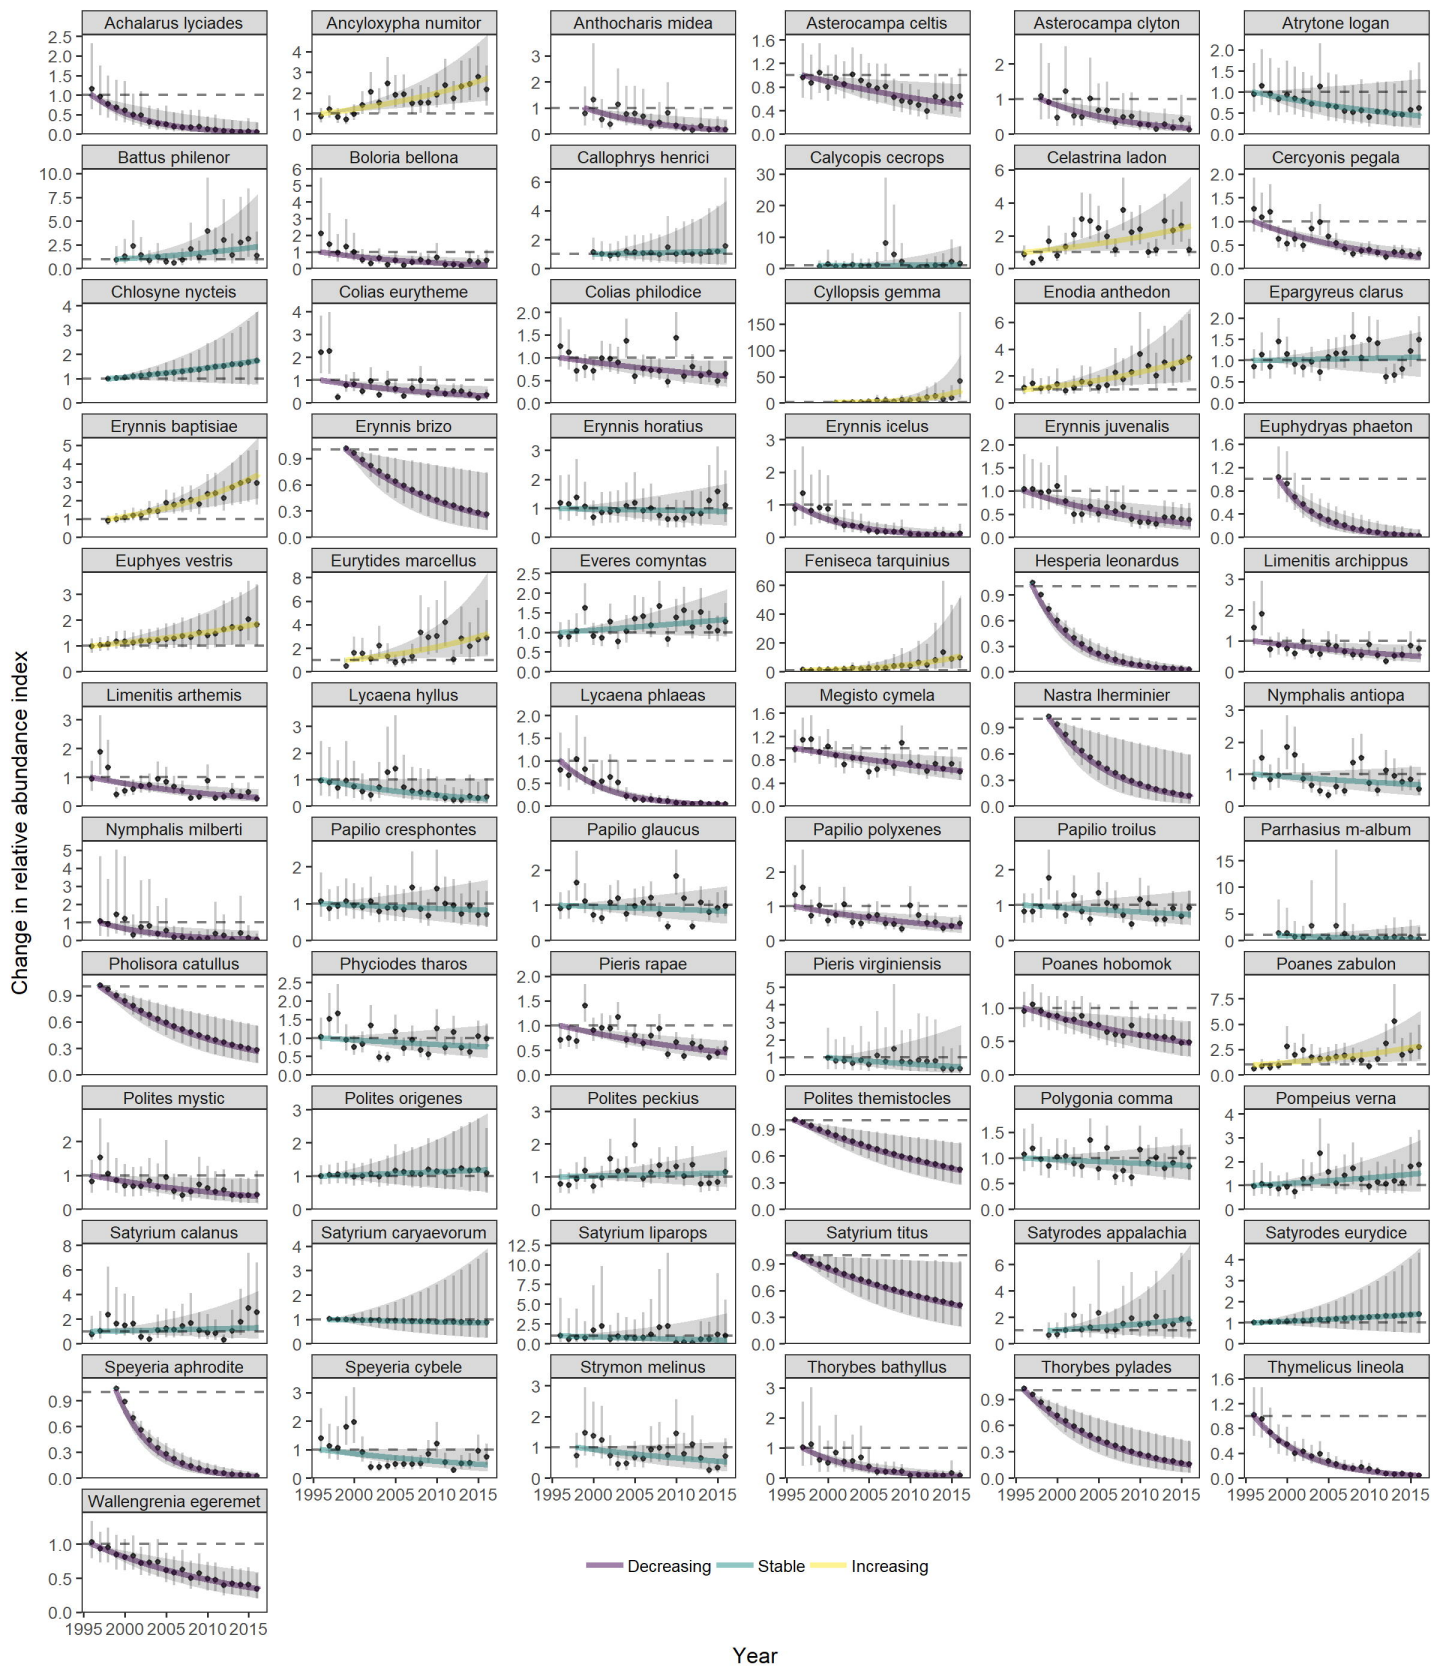

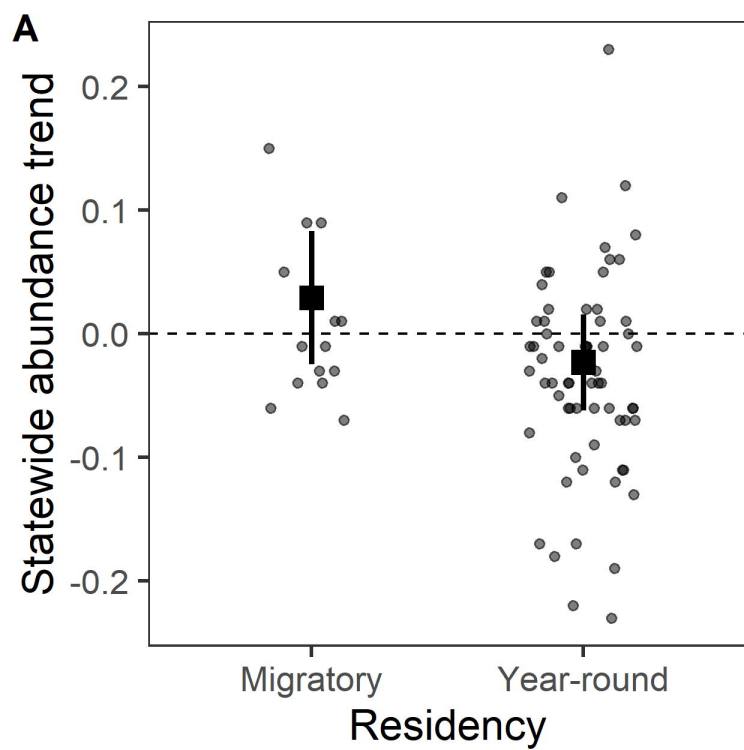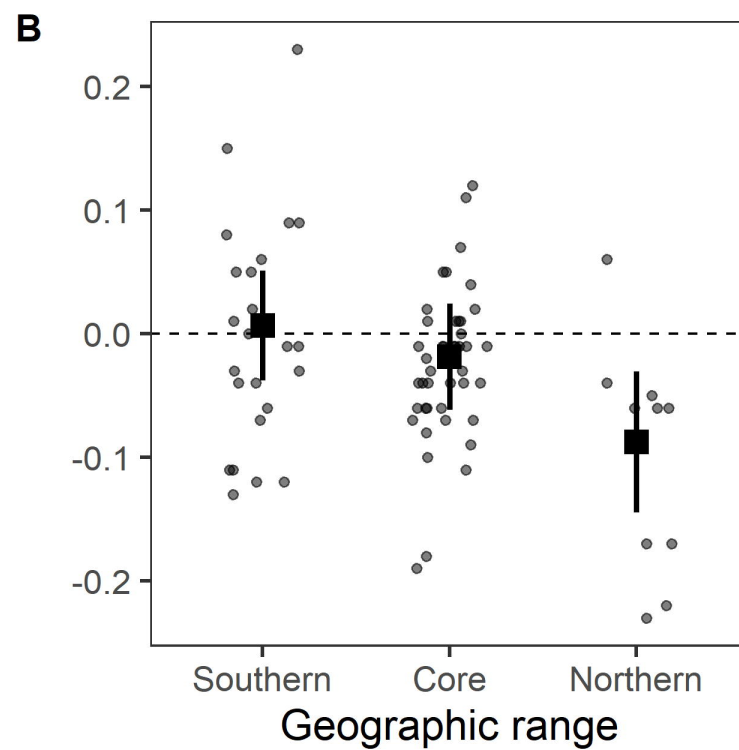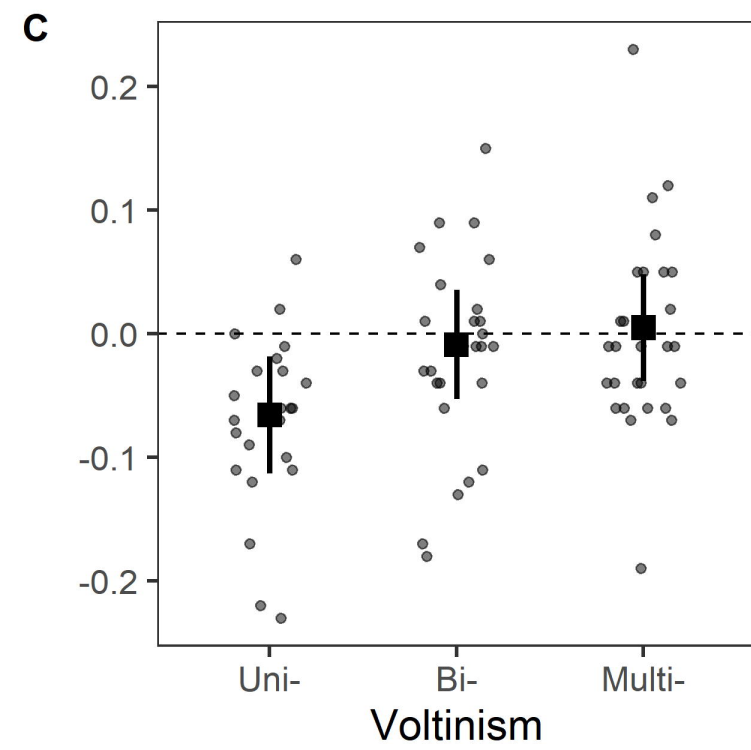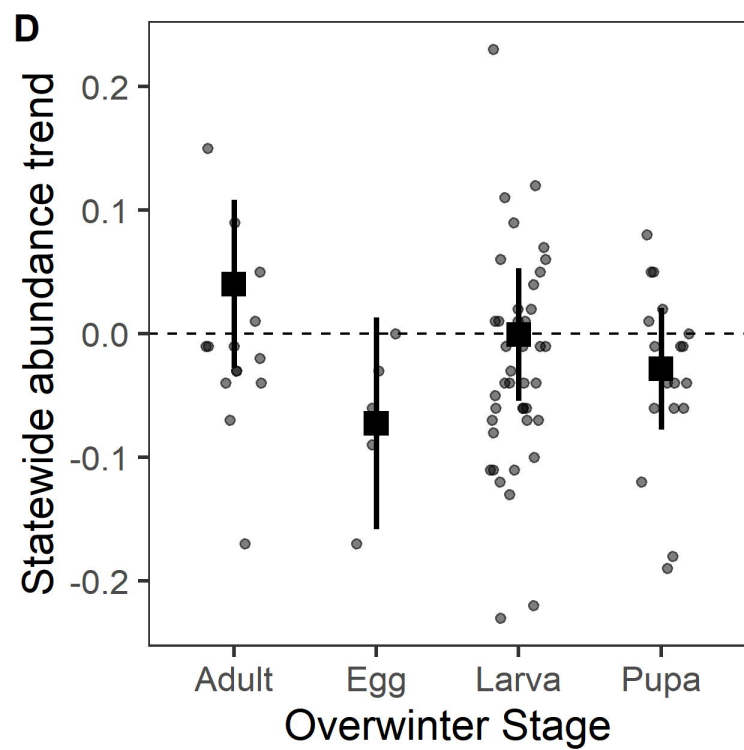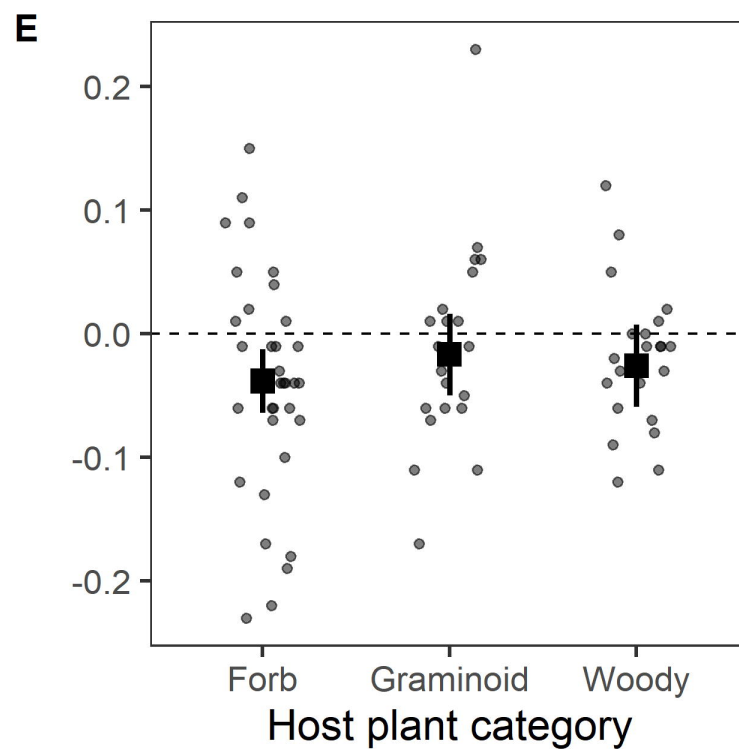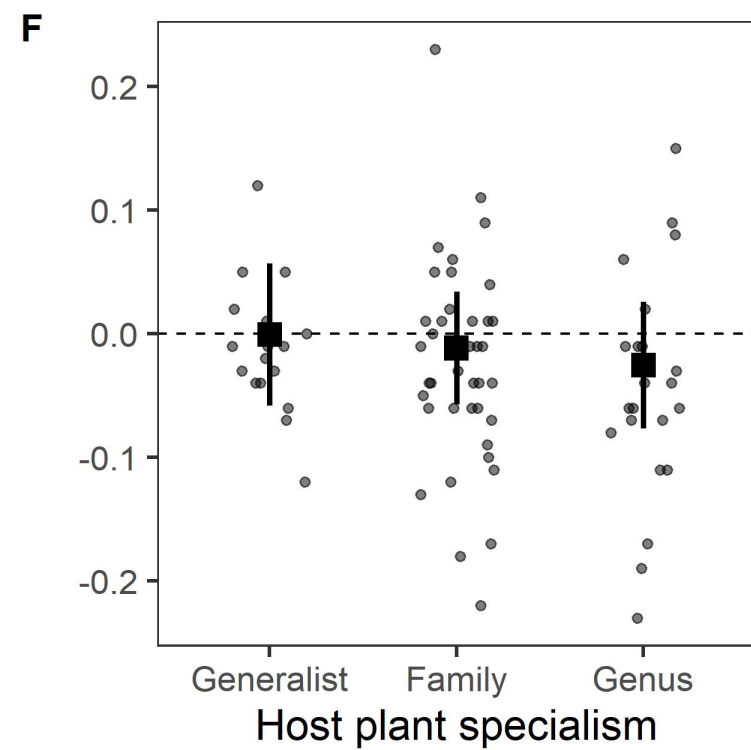

Source: https://www.biorxiv.org/content/10.1101/613786v3.full.pdf
